# 1 Investigation of layer specific BOLD 2 in the human visual cortex during 3 visual attention

4 **Tim van Mourik<sup>1\*†</sup>, Peter J. Koopmans<sup>2†</sup>, Lauren J. Bains<sup>1</sup>, David G. Norris<sup>1,2‡</sup>,**  
5 **Janneke F.M. Jehee<sup>1\*‡</sup>**

**\*For correspondence:**

6 [tim@timvanmourik.com](mailto:tim@timvanmourik.com) (Tim van  
Mourik); [jjehee@donders.ru.nl](mailto:jjehee@donders.ru.nl)  
(Janneke Jehee)

7 <sup>†</sup>These authors contributed equally  
to this work

8 <sup>‡</sup>These authors contributed equally  
to this work

9 <sup>1</sup>Radboud University Nijmegen, Donders Institute for Brain, Cognition and Behaviour,  
Kapittelweg 29, 6525EN Nijmegen, The Netherlands; <sup>2</sup>Erwin L. Hahn Institute for  
Magnetic Resonance Imaging, Kokereiallee 7, D-45141 Essen, Germany

---

10 **Abstract** Directing spatial attention towards a particular stimulus location enhances cortical  
11 responses at corresponding regions in cortex. How attention modulates the laminar response  
12 profile within the attended region, however, remains unclear. In this paper, we use high field (7T)  
13 fMRI to investigate the effects of attention on laminar activity profiles in areas V1-V3; both when a  
14 stimulus was presented to the observer, and in the absence of visual stimulation. Replicating  
15 previous findings, we find robust increases in the overall BOLD response for attended regions in  
16 cortex, both with and without visual stimulation. When analyzing the BOLD response across the  
17 individual layers in visual cortex, we observed no evidence for laminar-specific differentiation with  
18 attention. We offer several potential explanations for these results, including theoretical,  
19 methodological and technical reasons. Additionally, we provide all data and pipelines openly, in  
20 order to promote analytic consistency across layer-specific studies, improve reproducibility, and  
21 decrease the false positive rate as a result of analytical flexibility.

---

## 23 Introduction

24 Directing visual attention to a location in the visual field typically improves behavioral sensitivity  
25 to stimuli presented at that location (*Posner, 1980; Lee et al., 1997a; Yeshurun and Carrasco, 1998;*  
26 *Carrasco et al., 2004; Baldassi and Verghese, 2005; Ling et al., 2009*). It is well known that these  
27 attentional benefits in behavior are accompanied by increases in BOLD response in early visual  
28 areas (e.g. *Brefczynski and DeYoe (1999); Gandhi et al. (1999); Kastner et al. (1999)*), but how  
29 top-down processes modulate cortical responses at the laminar level remains unknown.

30 It is known from anatomical studies that the human cerebral cortex can be subdivided into  
31 histological layers with different cell types. The cytoarchitectonic structure varies across the brain  
32 and forms the basis of the Brodmann atlas (*Brodmann, 1909*). While the precise function of each  
33 cortical layer remains unclear, their connectivity profile suggests a division in terms of bottom-up  
34 and top-down processing (*Felleman and Van Essen, 1991; Barone et al., 2000; Shipp, 2016*). Most  
35 brain areas have six different histological layers. Specifically, Layer IV and to a lesser extent Layer  
36 V/VI are commonly associated with receiving feedforward drive from Layer III of lower cortical areas  
37 or from the thalamus (*Jones, 1998; Constantinople and Bruno, 2013*). Layers I-II and VI, in contrast,  
38 are typically implicated in receiving downward information flow (feedback), which often originates  
39 from layer V (*Alitto and Usrey, 2003*). This bottom-up versus top-down connectivity profile of each  
40 of the layers is to some degree also paralleled in functional data. That is, from neurophysiological

41 and neuroimaging work, it is known that various visual stimuli and tasks can exert differential effects  
42 on the various layers (*Maier et al., 2010; Xing et al., 2012; Self et al., 2013; Vélez-Fort et al., 2014;*  
43 *O'Herron et al., 2016*). Intracranial work in monkeys, for instance, shows that for selective attention  
44 and working memory (two functions that are commonly associated with top-down processes),  
45 current source density is increased in deep and superficial compared to middle layers in primary  
46 visual cortex (*van Kerkoerle et al., 2017*). Similar layer specific patterns have been shown in animal  
47 functional MRI. For instance, whisker stimulation led to an increase in BOLD response in Layer IV of  
48 rat barrel cortex, before such an enhancement was observed in any of the other layers, suggesting  
49 that layer IV was the first to receive feed forward drive from upstream areas (*Yu et al., 2014*). In  
50 contrast, subsequent cortico-cortical connections in the same task appeared to activate Layers  
51 II-III and V in the motor cortex and contralateral barrel cortex before this affected any of the other  
52 layers, suggesting that these layers were the first to receive feedback signals. To what extent these  
53 results generalize to human cortex, however, remains to be investigated.

54 Recent advancements in fMRI have made it possible to also investigate the functional role  
55 of cortical layers in humans (e.g. *Polimeni et al. (2010); Maass et al. (2014); Kok et al. (2016);*  
56 *Lawrence et al. (2018); Sharoh et al. (2019)*). The human in vivo resolution with fMRI has increased  
57 to submillimetre voxel size. The thickness of the cerebral cortex varies between 1 and 4.5 millimetres  
58 (*Zilles, 1990; Fischl and Dale, 2000*), giving sufficient resolution to characterise activity across the  
59 individual layers. fMRI is now often used to try and measure layer specific activation in, for example,  
60 the visual system (*Muckli et al., 2015; Kok et al., 2016; Lawrence et al., 2018; de Hollander et al.,*  
61 *2020*), the motor system (*Huber et al., 2018*), working memory tasks (*Finn et al., 2019*), and to  
62 find directional connectivity between language areas (*Sharoh et al., 2019*). If layer specific analysis  
63 can make good on its promise of reliably discerning layer specific signals, it can be useful for  
64 answering questions in a wide range of cognitive domains (*Lawrence et al., 2019*) and for questions  
65 of directional connectivity and cognitive network neuroscience (*Huber et al., 2020*), including  
66 research questions involving spatial attention.

67 While some neurophysiological evidence suggests a differential involvement of the cortical  
68 layers in top-down attention (*Nandy et al., 2017; van Kerkoerle et al., 2017*), the effects of attention  
69 on the different layers in human visual cortex has remained unclear. Here, we examine with fMRI  
70 the potential influence of spatial attention on BOLD activity in the deep, middle and superficial  
71 layers in human visual areas V1, V2, and V3. Participants directed their attention to a cued location,  
72 and performed an attention-demanding task using an orientation stimulus that was shown at  
73 this location, while an unattended grating appeared at a different location of equal eccentricity.  
74 On some of the trials, subjects directed their attention to the cued location in anticipation of the  
75 stimulus, but no stimulus appeared at this location. We took care to optimise the experimental  
76 paradigm, the acquisition, the preprocessing pipeline, the number of subjects, and the statistical  
77 analysis to all be state of the art and tailored for an fMRI investigation at laminar resolution. Our  
78 expectation was to find deep layer activation in a top-down (attention) condition and middle layer  
79 activation in the bottom-up (stimulus) condition, in line with a substantial body of aforementioned  
80 histological, electrophysiological, and fMRI literature. Interestingly, although we observed a reliable  
81 increase of the overall BOLD response with attention across all layers, both with and without a  
82 stimulus present, we observed no differences in activation level between the layers due to attention.  
83 We provide several reasons for these findings in the Discussion.

84 To facilitate reproducibility of our results, we further include a reproducible and openly ac-  
85 cessible processing pipeline for layer-specific analyses (<https://doi.org/10.5281/zenodo.3428603>  
86 (*Van Mourik et al., 2018*)). The toolbox includes benchmark tests for interactive visualisation of high  
87 resolution coregistration, cortical lamination, and cardiac and respiratory noise filtering. To enhance  
88 transparency, the data analysis pipeline is furthermore presented as an online visual workflow  
89 that can be easily inspected, shared, and adapted to fit any laminar study's needs. As a result of  
90 the relative novelty of fMRI investigations into individual cortical layers, previous work has used a  
91 large variety of high-resolution toolboxes and analysis pathways (LAYNII in *Huber et al. (2017, 2018)*;

92 OpenFmriAnalysis in *Lawrence et al. (2018)*; Nighres in *Huntenburg et al. (2018)*; BrainVoyager in  
93 *Goebel (2012)*), which has made direct comparison between studies difficult. We hope our analysis  
94 pipeline will help ameliorate this issue, although we readily recognize that other toolboxes and  
95 solutions could similarly achieve such goals.

## 96 Results

97 We first describe the overall task effects that form the basis for our laminar specific fMRI analysis.  
98 Our experimental paradigm is depicted in *Figure 4* and described in detail in Methods and Materials.  
99 In brief, we used an orientation discrimination task in order to investigate the (laminar specific)  
100 effects of a visual stimulus and directed spatial attention. Analysis of the behavioural results showed  
101 that subjects generally performed well on the task. The mean orientation discrimination threshold  
102 across participants was 6.6°.

### 103 Spatial attention increases fMRI response amplitudes

104 The experiment consisted of four experimental conditions: a two-by-two design in which we  
105 manipulated the effect of bottom-up visual stimulation combined with an attentional manipulation  
106 across the two hemifields. The stimulus consisted of two orientation gratings presented to the left  
107 and right side of fixation. Participants were cued to attend to one location at either side of fixation.  
108 They performed a two-alternative-forced-choice task on the stimulus at the attended location,  
109 indicating whether its orientation was rotated clockwise or counter clockwise with respect to the  
110 nearest diagonal orientation. They maintained fixation on a central bull's-eye stimulus throughout  
111 the experiment. The design is described in detail in the Methods and Materials and in *Figure 4*.

112 To benchmark the data, we first determined whether directing attention to a spatial location  
113 led to a stronger overall response in the visual cortex. Regions of interest consisted of voxels that  
114 were significantly activated by the stimulus in all layers of areas V1, V2, and V3 (see Methods). We  
115 compared the amplitude of the BOLD response with and without attention, for trials in which a  
116 stimulus was presented and those in which no stimulus appeared on the screen (see *Figure 3*). Data  
117 were analyzed using a General Linear Model (GLM) with area, attention (attended vs. unattended),  
118 and stimulus (present vs. absent) as factors (see Methods).

119 We first focused on the effects of attention per se. Attention significantly enhanced the BOLD  
120 response at the attended location in areas V1-V3 (effect of attention,  $F(1, 16) = 121.3, p = 7.07 \cdot 10^{-9}$ ).  
121 The mean effect sizes (in percent signal change) were 1.01%, 1.09% and 0.96% for V1, V2, and V3  
122 respectively, and slightly stronger to those reported before (e.g., *Murray (2008)*; *Jehee et al. (2011)*;  
123 *Sprague and Serences (2013)*). To account for potential variation in baseline response between  
124 visual areas, and facilitate direct comparison with previous studies, we computed an Attentional  
125 Modulation Index (AMI; *Kastner et al., 1999*). The AMI is defined as attentional effects normalised  
126 by the summed activity of both attended and unattended conditions. We found AMIs ( $\mu \pm \sigma$ ) of  $0.18$   
127  $\pm 0.05$  for V1,  $0.24 \pm 0.07$  for V2, and  $0.24 \pm 0.09$  for V3. Direct comparison between areas revealed  
128 that although the absolute contribution of attention did not change, the relative contribution  
129 of attention differed significantly between regions (AMI:  $F(2,32)=10.53, p = 3.07 \cdot 10^{-4}$ . Post-hoc  
130 comparison showed significant differences in V1 compared to V2:  $T(16) = -4.69, p = 2.44 \cdot 10^{-3}$  and  
131 in V1 compared to V3  $T(16) = -3.17, p = 5.89 \cdot 10^{-3}$ , but not in V2 compared to V3:  $T(16) = -0.14,$   
132  $p = 0.89$ ). Altogether, these results are in line with previously reported effects of attention on  
133 coarse-level BOLD activity in visual cortex (*Somers et al., 1999*; *Gandhi et al., 1999*), and show that  
134 the cortical response for a spatial location is enhanced when attention is directed to that location.

135 Next, we investigated whether the effects of attention depended on the presence of a visual  
136 stimulus. Also in the absence of visual stimulation, there was a significant attention effect ( $T(16) =$   
137  $9.80, p = 3.64 \cdot 10^{-8}$ ), with mean effect sizes of 0.93%. We furthermore observed a slight negative BOLD  
138 response in the absence of visual stimulation and when the location was ignored ( $T(16) = -3.12,$   
139  $p = 0.0066$ ). This result should be interpreted with caution, however, as the experiment did not  
140 include an attention-neutral condition and responses were computed with respect to an implicit

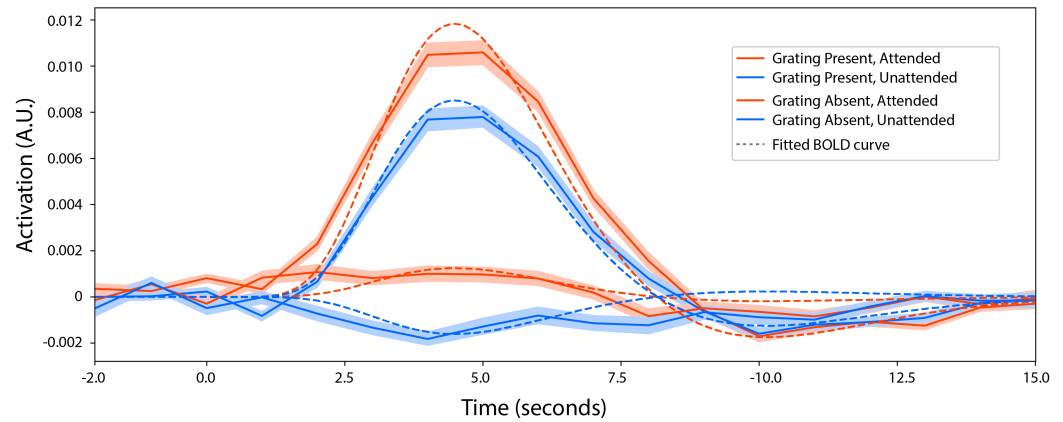

**Figure 1.** The fitted BOLD response for each experimental condition. The shaded area represents the standard error of the mean over subjects. Results were obtained by fitting a Finite Impulse Response function of 18 time points to the BOLD data, starting at 2 seconds before and running until 15 seconds after stimulus onset. The dashed line indicates an HRF that was fitted to the FIR results of a pilot session. The obtained parameter values were used in the modelled HRF across layers in our GLM analyses (see Methods). These results are collapsed over hemisphere.

**Figure 1-Figure supplement 1.** The results for the left and right hemisphere separately are displayed in the supplementary figures

141 baseline response. We next compared attentional effects between trials in which observers were  
142 expecting a stimulus but none was presented, and trials in which the stimulus did appear on  
143 the screen. We found that the effect of attention in areas V1-V3 was significantly different in the  
144 presence compared to absence of visual stimulation (two-way interaction between attention and  
145 stimulus,  $F(1, 16) = 6.63$ ,  $p = 0.0204$ ). Specifically, in the presence of a stimulus, the attentional effect  
146 was slightly higher ( $T(16) = 2.87$ ,  $p = 0.0060$ ), with no reliable difference between areas (three-way  
147 interaction between stimulus, attention and area,  $F(2, 32) = 0.324$ ,  $p = 0.726$ ). Thus, attending to a  
148 spatial location clearly enhances the BOLD response at that location, even in the absence of visual  
149 stimulation, albeit that attentional effects were slightly reduced when no stimulus was presented to  
150 the observer.

151 To qualitatively assess the shape of the BOLD response over time and confirm the param-  
152 eters of our GLM approach, we additionally conducted a Finite Impulse Response (FIR) anal-  
153 ysis. The FIR analysis can be inspected and reproduced online in a Jupyter Notebook (<https://github.com/TimVanMourik/LayerAttention/blob/master/Notebooks/LayerFir.ipynb>). We extracted  
154 BOLD response curves for each experimental condition (see **Figure 1**), and observed clear and reli-  
155 able effects of attention on the BOLD response that were fully consistent with our previous analyses.  
156 Because of the left-right modulation of attention, attentional effects were reversed in the left and  
157 right hemisphere, as observed before and further illustrated in **Figure Supplement 1**. Moreover,  
158 the cortical response over time for each condition was very well described by the canonical Hemo-  
159 dynamic Response Function (HRF) ( $r^2 = 0.982$  with attention and  $r^2 = 0.985$  without attention). Thus,  
160 the HRF model presented a fair description of the cortical responses observed in our experiment.  
161

## 162 **Spatial attention increases responses across the layers**

163 Next, we asked whether attention led to changes in the pattern of activity across cortical layers.  
164 For each attention and stimulus condition, we first characterized the BOLD response over time for  
165 each of three distinct cortical layers in areas V1-V3 combined. Specifically, we used a FIR analysis to  
166 obtain the temporal laminar BOLD response profiles shown in **Figure 2**. The analysis revealed clear  
167 hemodynamic response profiles that were well captured by the canonical HRF. In the presence of  
168 a stimulus, there appeared to be a progressive increase in response from the deep to the middle  
169 to the top layers, for both the stimulus and attention. In the absence of a stimulus, however, the

170 layer-specific hemodynamic responses did not appear to show noticeable differences.

171 To assess the significance of these effects, data were analyzed using a temporal general linear  
172 model with attention, stimulus, area, and layer as factors (see Methods). We found a reliable  
173 increase in BOLD response from white matter to pial surface (see **Figure 3**, overall effect of cortical  
174 depth,  $F(2, 32) = 87.5$ ,  $p = 1.07 \cdot 10^{-13}$ ). This increase in BOLD response with decreasing distance  
175 to the pial surface was reliably larger in the presence of a stimulus (two-way interaction between  
176 layer and stimulus,  $F(2, 32) = 85.6$ ,  $p = 1.43 \cdot 10^{-13}$ ). Attention also led to reliable increases in BOLD  
177 response with decreasing distance to the pial surface (two-way interaction between layer and  
178 attention,  $F(2, 32) = 43.10$ ,  $p = 8.34 \cdot 10^{-10}$ ). This increase in BOLD response from lower to higher  
179 layers has been observed (e.g. *Koopmans et al. (2010)*; *Polimeni et al. (2010)*; *Koopmans et al.*  
180 *(2011)*; *Olman et al. (2012)*; *Huber et al. (2018)*) and modeled (*Markuerkiaga et al., 2016*; *Havlicek*  
181 *and Uludağ, 2020*) previously, and is consistent with the blood flow from the gray-white matter  
182 boundary to the pial surface. That is, any change in BOLD response that arises in the deep layers  
183 will automatically affect responses in downstream layers, simply because blood flows from deeper  
184 to more superficial layers. The accumulation of blood in downstream layers can result in a larger  
185 slope of BOLD activation across the layers, even when there is no change in neural activity in these  
186 layers.

187 Next, we determined whether the layer-specific increase in BOLD signal was different for  
188 attention-based effects compared to those of the visual stimulus. If so, then this would be consistent  
189 with a targeted effect of attention on one of the layers. Interestingly, the attention-based increase in  
190 activity was reliably different from stimulus-driven changes in layer response (post hoc comparison  
191 between layer by stimulus effect and layer by attention effect;  $T(16) = 9.28$ ,  $p = 7.64 \cdot 10^{-8}$ ). This  
192 could potentially reflect a specific effect of attention on one of the layers. However, there is also an  
193 alternative interpretation, as the magnitude of an interaction effect is tightly coupled to the strength  
194 of its main effects in layer-specific analyses. This is because the interaction effect can be interpreted  
195 as a difference in slope (signal by depths) between two lines. Due to cortical signal leakage as a  
196 result of physiological (blood flow) and methodological reasons (errors in depth measurement), a  
197 higher visual stimulus response than an attentional response will be visible in *both* the main effect  
198 *and* the cortical slope of the response (see also above). Any reliable difference in slope is picked up  
199 as a significant difference between layer by stimulus effect and layer by attention effect. However,  
200 this difference in slope would also arise if there was no layer-specific change in neural activity, so  
201 this finding alone does not indicate conclusive layer specific activation. Such conclusions might be  
202 made if a reliable three-way difference between the effects of attention and stimulus between any  
203 of the three layers would be present. However, we did not find a significant three-way interaction  
204 (three-way interaction between layer, stimulus and attention,  $F(2, 32) = 0.96$ ,  $p = 0.393$ ), making it  
205 difficult to draw any firm conclusions regarding the layer-specific effects of the stimulus versus  
206 attention.

207 While we observed no clear and unambiguous laminar differences across visual areas, could  
208 there be a change within a given area? When analyzing stimulus activity, the pattern of activity  
209 across the layers was, indeed, significantly different between the three areas (three-way interaction  
210 between layer, stimulus, area:  $F(4, 64) = 3.10$ ,  $p = 0.021$ ). Post hoc analyses revealed that the stimulus  
211 response across layers was slightly steeper in V1 than V2 (stimulus by layer effect in area V1  
212 compared to V2,  $T(16) = 2.26$ ,  $p = 0.038$ ), while no significant difference was observed for area V1  
213 compared to area V3 ( $T(16) = 1.35$ ,  $p = 0.196$ ), or V2 compared to V3 ( $T(16) = -1.43$ ,  $p = 0.172$ ). This  
214 might reflect a slightly higher top layer activation in V1 compared to V2. On the other hand, it could  
215 also reflect the stronger main effect of stimulus in V1, leading to an increased slope of activation  
216 over layers, in line with expectations based on blood flow. We then focused on the layer-specific  
217 effects of attention in each individual area. Attention does not vary layer specifically per region  
218 (attention by layer by region effect  $F(64, 4) = 0.998$ ,  $p = 0.416$ ).

219 Thus, while the overall effects on BOLD activity of both visual stimuli and attention were robust  
220 and similar to previously reported values for visual cortex (e.g. *Kastner et al., 1999*; *Jehee et al.,*

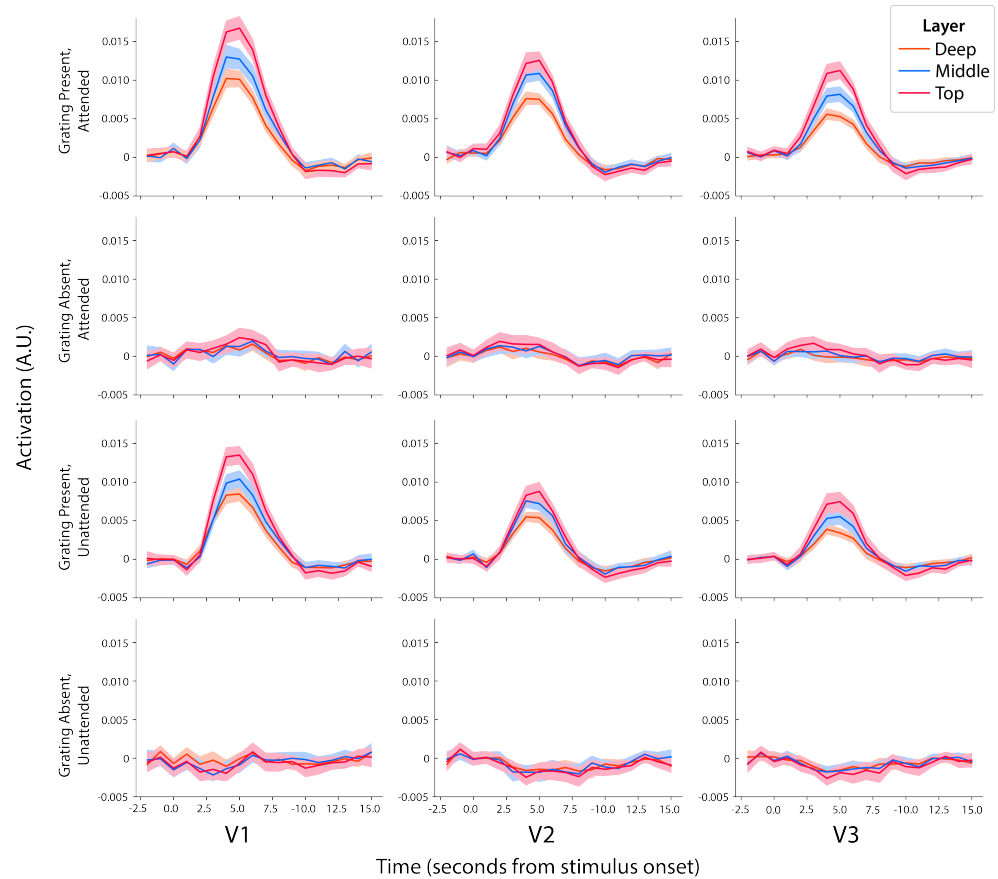

**Figure 2.** The fitted BOLD response for each experimental condition for three cortical layers. The shaded area represents the standard error of the mean over subjects. The horizontal axis represents time (in seconds) from stimulus onset.



221 **2011; Koopmans et al., 2010**)), both across and within layers, it proved more difficult to interpret  
222 the layer-specific pattern of activity for the two conditions. Although at first sight, it may appear  
223 that the stimulus affected the layers in a manner different from attention (when analyzed across  
224 areas), the effect should be interpreted with caution because the stimulus also led to a stronger  
225 coarse-level cortical response than attention. We wanted to rule out that some important parameter  
226 choices obscured true effects. We verified robustness of our main results by changing the size  
227 of the region of interest and by varying the most important parameters of our layer extraction  
228 technique. We reprocessed the data and recomputed our layer and region specific statistical  
229 analysis for the experimental conditions. The control analyses established that the results were  
230 not strongly affected by the number of voxels included in the analyses (**Figure Supplement 1** and  
231 **Figure Supplement 2**), nor by the number of layers analyzed (**Figure Supplement 3**). In addition,  
232 the results did not qualitatively change when layer activation profiles were defined using volume  
233 interpolation (**Figure Supplement 4**) as opposed to using a laminar spatial GLM as we did in the  
234 main analyses (see Methods). The control analyses and their comparison with the main analysis is  
235 further described in the supplemental materials.

236 All figures and reported statistics are available as Jupyter Notebooks (<https://doi.org/10.5281/zenodo.3428603>). The (fully anonymised) BOLD time courses are included such that all results can  
237 be readily reproduced.  
238

## 239 Discussion

240 This study investigated the effects of spatial attention on the BOLD signal measured from individual  
241 layers in early visual cortex. Focusing first on the overall amplitude of the BOLD response in  
242 all layers combined, we found that attending to a stimulus reliably and substantially increased  
243 the BOLD signal in early visual areas, both when a stimulus was presented to the observer and  
244 in the absence of physical stimulation (cf. (**Kastner et al., 1999; Murray, 2008; Li et al., 2008**)).  
245 Moreover, and much in line with earlier results on layer-specific activation patterns in visual cortex  
246 (**Koopmans et al., 2010; Polimeni et al., 2010**), we observed a general increase in activation towards  
247 the superficial layers, which is likely caused by greater susceptibility to draining veins on the pial  
248 surface (**Koopmans et al., 2011**). Interestingly, and much to our surprise, we observed no forthright  
249 differential activity in the individual layers when comparing between top-down (attention-driven)  
250 and bottom-up (stimulus-driven) activity - a finding that stands in notable contrast to some previous  
251 observations. We discuss several potential reasons for the discrepancy in findings below, and  
252 suggest a more standardized approach to laminar fMRI analysis as a potential solution that could  
253 boost agreement in research findings.

254 Why did we not find a targeted effect of attention on one of the layers? One possibility is that  
255 our data are simply insufficiently robust to show a significant difference in activity across depth  
256 between the two conditions. It is well known that the BOLD signal includes multiple sources of noise  
257 related to both MRI scanner and participant, and this holds especially true for signals recorded  
258 at the sub-millimeter scale. For example, at a resolution this high, even the smallest movement  
259 of the participant may cause additional blurring of the data, with potentially detrimental effects  
260 on the signal-to-noise ratio. For this reason, we collected data from 17 participants - a sample  
261 size much larger than typical in attention-based fMRI studies at standard spatial resolution (cf.  
262 N=4-6 in **Kastner et al. (1999); Kamitani and Tong (2005); Jehee et al. (2011)**), and on the high end  
263 compared to layer-based fMRI studies at high resolution (cf. N=6 in **Polimeni et al. (2010)**, N=4 in  
264 **Muckli et al. (2015)**, N=10 in **Kok et al. (2016)**, N=12 in **Klein et al., 2018**), N=21 in **(Lawrence et al.,  
265 2018)**, N=22 in **(Sharoh et al., 2019)**). To minimize the effects of various sources of noise, we took  
266 great care in measuring and removing physiological artifacts, and further improved existing layer  
267 extraction techniques by developing a novel technique to separate laminar signal from different  
268 layers (**Van Mourik et al., 2019**). Indeed, the combined success of these procedures is well illustrated  
269 by the effect sizes observed in the current study for both stimulus presentation (4.5%, 3.3%, 2.8% in  
270 V1, V2 and V3) and attention (0.41%, 0.64%, 0.59% in V1, V2 and V3), which are comparable or higher

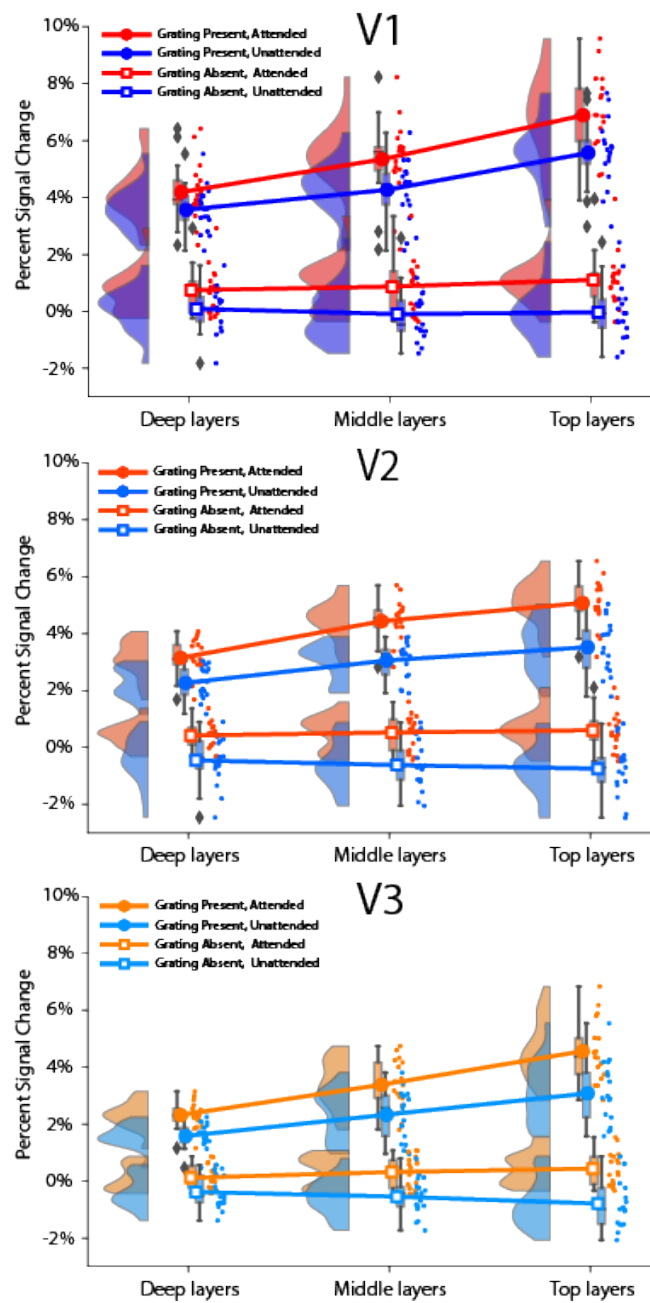

**Figure 3.** Layer-specific amplitude of the BOLD response in areas V1-V3, for stimuli and locations that were either attended or ignored. Circles indicate when a grating was presented, squares depict when no grating was presented, at either the attended (red) or unattended (blue) location. When a stimulus was presented, activation reliably increased across all layers. Also attention significantly enhanced the BOLD response across all layers.



271 to those reported in previous work (*Murray, 2008; Jehee et al., 2011*). We also ensured that similar  
272 results were obtained using more conventional layer-extraction procedures, and that the results  
273 were robust to changes in signal extraction method or number of layers. There are, however, some  
274 differences in experimental design between our study and previous laminar investigations that  
275 could potentially account for the incongruity in results. Because we were interested in the degree to  
276 which top-down processes could be dissociated from feed forward stimulation with fMRI, we directly  
277 contrasted between these two conditions in our analyses. Previous studies, on the other hand,  
278 have focused on top-down activity in isolation (e.g. *Muckli et al. (2015), Kok et al. (2016), Lawrence*  
279 *et al. (2018)*). Two-by-two experimental designs are surprisingly rare in layer-specific analysis and  
280 have only been recently employed by *de Hollander et al. (2020)*. We emphasise that a multifactorial  
281 design is important to account for changes due to, for example, cortical depth and signal leakage  
282 per se, as opposed to true layer-based changes in activity due to the experimental manipulations.  
283 Alternate strategies are to compare between layers and conditions in terms of information content  
284 (*Muckli et al., 2015*), retinotopic preference (*Klein et al., 2018*), or by focusing on inter-regional  
285 laminar communication (*Sharoh et al., 2019*). For example, *Klein et al. (2018)* recently observed  
286 a cortical depth-dependent shift in population receptive fields with spatial attention. This raises  
287 the intriguing possibility that, in our study, spatial attention led to a depth-dependent shift in the  
288 strength of relatively fine-grained orientation-selective responses – indeed, previous coarse-scale  
289 fMRI studies have observed that orientation selectivity can change even when there is no change in  
290 amplitude across the population (*Jehee et al., 2011, 2012*).

291 We initially hypothesised that attention provides additional information about the stimulus  
292 (e.g. knowledge about its location). This information would come from higher level areas, and  
293 would presumably affect the deep or superficial layers. This was suggested by previous work using  
294 high-resolution fMRI focussing not on spatial attention, but rather figure-ground segmentation (*Kok*  
295 *et al., 2016*), and other extra-classical receptive field effects in cortex (*Muckli et al., 2015*). However,  
296 our results are incongruent (insofar that they are comparable) and do not find similar effects for  
297 spatial attention. It is conceivable, however, that processes of perceptual grouping operate on the  
298 individual cortical layers in a manner different from the spatial attentional mechanisms studied  
299 here. It is known from primate studies, for example, that attention increases the response gain  
300 of neurons in visual cortex (*Treue and Trujillo, 1999; Martinez-Trujillo and Treue, 2004a*) - such an  
301 increase in attentional gain could lead to general enhancements in neural activity irrespective of  
302 cortical layer, as we have observed here.

303 Regardless of the potential reasons for the disparity between current and previous results,  
304 we believe our study presents an important message to a field that is currently in its nascent  
305 stages of development. We hope that the results and procedures detailed here will help move the  
306 field forward and resolve which experimental parameters are paramount to detecting differential  
307 activity between individual layers in human visual cortex with high-resolution fMRI. To facilitate  
308 comparison between results, and provide loose analysis guidelines for future laminar studies, we  
309 have furthermore provided all our analysis code and data online (see Data Availability section), in  
310 a format that is visually insightful and analytically meaningful. We hope that our software and  
311 analysis pathways will prove to be a useful resource, and boost the comparability and replicability  
312 of future results.

## 313 **Methods and Materials**

### 314 **Participants**

315 Nineteen healthy adults (aged 22-27, eight female), with normal or corrected-to-normal vision,  
316 participated in this study. All participants provided written informed consent in accordance with the  
317 guidelines of the local ethics committee (CMO region Arnhem-Nijmegen, the Netherlands, and ethics  
318 committee of the University Duisburg-Essen, Germany). Two subjects were excluded from analysis;  
319 one subject was excluded due to insufficient performance on the orientation discrimination task

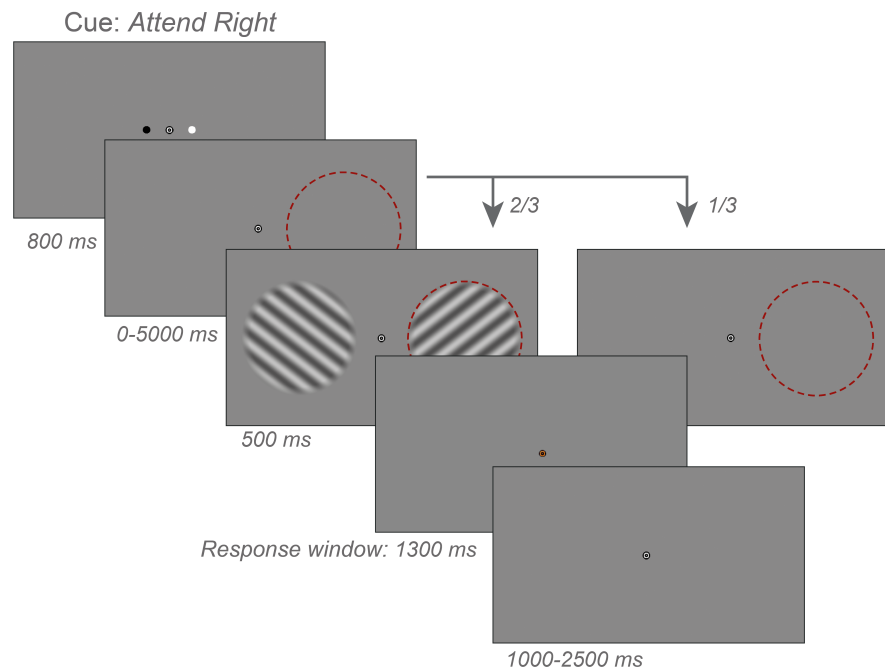

**Figure 4.** Stimuli and experimental procedure. Example of a trial sequence from the experiment. Subjects fixated a central bull's eye target while gratings of independent orientation ( $\pm 45^\circ$ ) appeared in each hemifield. A compound black/white cue indicated whether subjects should attend to the left or right stimuli; in this example, the white circle indicates 'attend right.' Subjects had to discriminate near-threshold changes in orientation of the attended grating with respect to the closest diagonal. In one-third of trials, no stimuli appeared at either location. Red circles depict the attended location and were not present in the actual display.

320 (their behavioral performance was at chance-level), and another due to weak retinotopic maps. The  
321 remaining data from 17 subjects were analyzed.

### 322 **Experimental design and stimuli**

323 Observers viewed the visual display through a mirror mounted on the head coil. Visual stimuli were  
324 generated by a Macbook Pro computer running MATLAB and the Psychophysics Toolbox software  
325 (Brainard, 1997; Pelli, 1997), and displayed on a rear-projection screen using a luminance-calibrated  
326 EIKI projector (resolution 1,024 X 768 pixels, refresh rate 60 Hz). Participants were required to  
327 maintain fixation on a central bull's-eye target (radius:  $0.25^\circ$ ) throughout each experimental run.  
328 Each run consisted of an initial fixation period (3000 ms) followed by 32 stimulus trials (average trial  
329 duration: 4.7 seconds). Trials were separated by inter-trial intervals of variable duration (1000-2500  
330 ms, uniformly distributed across trials). Each trial started with the presentation of a central attention  
331 cue (800 ms). This was followed by a delay period of variable duration (0-5000 ms; drawn from an  
332 exponential distribution to ensure a constant hazard rate), after which the two orientation stimuli  
333 appeared on the screen (500 ms; two-thirds of trials). The orientation stimuli were followed by a  
334 response window (1300 ms), in which the fixation target turned orange, and observers indicated  
335 their response by pressing a button with their right index or middle finger. On one-third of the  
336 trials, no orientation stimuli appeared and the screen remained blank for the remainder of the trial.  
337 A single trial of the experiment is illustrated in **Figure 4**.

338 Stimuli were two counterphasing sinusoidal gratings of independent orientation  $\sim 45^\circ$  or  $\sim 135^\circ$ ;  
339 size:  $7^\circ$ ; spatial frequency: 1 cycle per  $^\circ$ ; randomized spatial phase; contrast: 50%; contrast  
340 decreased linearly to 0 towards the edge of the stimulus over the last degree), centered at  $5^\circ$  to  
341 the left and right of fixation. We used a compound white/black cue consisting of two dots (dot

342 size 0.25°) that straddled the fixation point (0.8° to the left and right of fixation) to indicate with  
343 100% validity which of the two gratings should be attended (*Jehee et al., 2011*). Subjects were  
344 instructed to attend to the same side of fixation as either the white or black dot in the compound  
345 cue. Participants were instructed to detect a small clockwise or counterclockwise rotation in the  
346 orientation of the grating at the attended location with respect to a base orientation at 45° or 135°.  
347 The size of rotation offset was adjusted with an adaptive staircase procedure using QUEST (*Watson  
348 and Pelli, 1983*), such that participants detected approximately 80% of the offsets correctly.

349 All but one participant completed 18 stimulus runs. The remaining participant completed 12  
350 runs due to equipment failure. Retinotopic maps of visual cortex were acquired in a separate scan  
351 session at a 3T scanner using conventional retinotopic mapping procedures (*Sereno et al., 1995*;  
352 *DeYoe et al., 1996*; *Engel et al., 1997*).

### 353 **MR data acquisition**

354 Functional images were acquired on a Magnetom Siemens 7T scanner with a 32-channel head coil  
355 (Nova Medical, Wilmington, USA) combined with dielectric pads (*Teeuwisse et al., 2012*), using a  
356  $T_2^*$ -weighted 3D gradient-echo EPI sequence (*Poser et al., 2010*) (TR/TE/ $\alpha$ =3060 ms/20 ms/14°, 72  
357 slices oriented orthogonally to the calcarine sulcus, voxel size [0.8 mm]<sup>3</sup>, FOV: [192 mm]<sup>2</sup>, GRAPPA  
358 factor 8).

359 Gradient maximum amplitude was 40 mT/m (in practice, however, this maximum was not  
360 reached) and the maximum slew rate was 200 T/m/s. Shimming was performed using the standard  
361 Siemens shimming procedure for 7T. There were 18 runs of 72 ± 4 volumes. As the lengths of the  
362 events and the inter trial interval were of unequal length, there was a small variation in the number  
363 of volumes per run.

364 Finger pulse was recorded using a pulse oximeter affixed to the index finger of the left hand.  
365 Respiration was measured using a respiration belt placed around the participant's abdomen.

366 Anatomical images were acquired using an MP2RAGE sequence (*Marques et al., 2010*) [0.75  
367 mm]<sup>3</sup>, yielding two inversion contrasts (TR/TE/TI1/TI2 = 5000 ms/1.89 ms/900 ms/3200 ms).

368 In a separate session prior to the main experiment, a retinotopy session was conducted at a  
369 Siemens 3T Magnetom Trio scanner. A high-resolution T1-weighted anatomical scan was acquired  
370 (MPRAGE, FOV 256 X 256, 1 mm isotropic voxels) at the start of the session. Functional images were  
371 subsequently collected using  $T_2^*$ -weighted gradient echo EPI, in 30 slices oriented perpendicular to  
372 the calcarine sulcus (TR/TE/ $\alpha$  = 2000 ms/30 ms/90°, FOV = 64 X 64, [2.2 mm]<sup>3</sup> isotropic resolution).

### 373 **Functional MRI preprocessing**

#### 374 **Data preprocessing**

375 Data were corrected for subject motion using SPM with the mean functional volume across time  
376 as a reference (*Friston et al., 1995*). Residual motion-induced fluctuations in the BOLD signal  
377 were removed through linear regression, based on the alignment parameters (3 translation and 3  
378 rotation parameters, no derivatives) of SPM. Scanner drifts were corrected via linear regression  
379 with high-pass filter regressors to filter out frequencies below 1/64 Hz. Pulsating signals as a result  
380 of the respiratory and cardiac cycle were removed as follows. The cardiac/respiratory peaks were  
381 automatically detected from the physiological recordings using in-house interactive peak-detection  
382 software, and manually corrected where needed. With a custom MATLAB implementation of  
383 RETROICOR (*Glover et al., 2000*), fifth order Fourier regressors were constructed for heart rate and  
384 respiration and subsequently removed from the functional images via linear regression. A small  
385 part (10% of respiratory measurements, and 18% of heart rate measurements) was of insufficient  
386 quality and could not be used in this analysis. Functional data for these time frames were used in  
387 the main analysis but uncorrected for cardiac and respiratory noise.

388 The functional and anatomical scans were brought to the same space by registering the anatomical  
389 surface from the retinotopy session to the mean functional volume using boundary based  
390 registration (BBR), implemented in FreeSurfer's `bbregister` (*Greve and Fischl, 2009*). All registration

---

391 results were inspected and manually refined when necessary. Where needed, registration was  
392 improved by an additional pass of BBR using an in-house MATLAB implementation. Local distortions  
393 in EPI due to field inhomogeneity were corrected by means of recursive boundary registration  
394 (*Van Mourik et al., 2019*), which recursively applies BBR to small portions of the cortical surface to  
395 correct topology locally by means of optimizing the grey-white matter contrast along the surface.  
396 We used 7 layers of recursion and only looked for translations and scalings in the phase encoding  
397 direction. Note that this procedure displaces the *surface mesh* and not the volume, so this has no  
398 smoothing effect on the (layer) signal.

399 Because of temporal changes in magnetic field inhomogeneity, local topology slightly changed  
400 over the course of the entire session. For this reason, the 18 functional runs obtained for each  
401 subject were first divided into three groups of each 6 contiguous runs, and then each group was  
402 pre-processed separately. Time courses were subsequently concatenated before entering the main  
403 analyses.

#### 404 Regions of Interest

405 Regions of interest (areas V1, V2, V3) were defined on the reconstructed cortical surface using  
406 standard retinotopic mapping procedures (*Sereno et al., 1995; DeYoe et al., 1996; Engel et al.,*  
407 *1997*). After identifying areas V1-V3, data from the main experiment were smoothed along the  
408 reconstructed cortical surface with a Gaussian kernel (FWHM: 4 mm). The smoothed version of  
409 the data was only used in region of interest selection, and not in the main analysis. In each area,  
410 we then selected the 600 vertices that responded most strongly to the stimulus (shown on the  
411 cortical surface in *Figure Supplement 1*). The selected vertices were resampled from the cortical  
412 surface back to subject space by means of FreeSurfer's `label2vol`. T-values of selected voxels ( $\mu \pm \sigma$ )  
413 were V1:  $T=2.989 \pm 0.854$ , V2:  $T=2.317 \pm 0.689$  and V3:  $T=2.117 \pm 0.713$ . Note that the selection of  
414 voxels based on visual activation per se is orthogonal to the analysis of interest, which addresses  
415 the effects of attention on individual layers in cortex. Control analyses verified that our results  
416 were not strongly affected by the number of vertices selected for subsequent analysis (See *Figure*  
417 *Supplement 1*).

#### 418 Cortical profile extraction

419 Layer specific signals were obtained by means of a layer specific spatial General Linear Model  
420 (GLM) as described in detail and proposed by (*Van Mourik et al., 2018*). In brief, we obtained three  
421 equivolume layers, following the procedures described in (*Waehnert et al., 2014*). We took the  
422 reconstructed cortical surface as determined by FreeSurfer (*Dale et al., 1999*) as a basis for this  
423 analysis. We used a custom implementation of *Waehnert et al. (2014)* with mild adaptations: the  
424 gradient and the curvature of the cortex were defined as a function of Laplacian streamlines in the  
425 grey matter as this more naturally follows the structure of cortical columns (*Leprince et al., 2015*).  
426 Partial volume inaccuracies were adjusted for by explicitly taking into account the orientation of the  
427 voxel with respect to the cortex (*Van Mourik et al., 2019*).

428 The procedure enabled us to divide the gray matter in three equivolume cortical layers, which  
429 amounts to roughly one voxel per layer. We additionally defined a volume on either side of these  
430 three cortical layers to capture signals for white matter and cerebrospinal fluid. On the basis  
431 of these definitions, we then computed a laminar mixing matrix of layer signal over the voxels  
432 (*Van Mourik et al., 2018*). This was used as a *spatial* design matrix to unmix the layer signal. By  
433 means of a spatial regression of this matrix against the functional data within the ROIs, we obtained  
434 laminar time courses.

435 In separate control analyses, we verified that our laminar results did not qualitatively depend  
436 on the specific methods that were used to extract the laminar activation profile. We varied several  
437 parameters: the number of layers that we extracted and the method of obtaining laminar signal. For  
438 the former, we computed the cortical layers with the spatial GLM for four layers instead of three. For

439 the latter, we computed the laminar signal based on a more conventional interpolation approach:  
440 by means of interpolating the fMRI volumes at three points in between the cortical surfaces we  
441 obtained laminar signal. This may contain contamination from other layers, but is impervious to  
442 potential estimation errors as a result of the laminar spatial regression. The difference between  
443 approaches is described in detail in *Van Mourik et al. (2018)*.

#### 444 **Temporal analysis**

445 Temporal linear regression was used to compare between the experimental conditions. Regressors  
446 were created as follows. The stimuli appeared during the stimulus window on 2/3rds of trials, which  
447 were modeled with a single regressor (stimulus on). The remaining stimulus windows were also  
448 modeled with a regressor (stimulus off). In addition, attention could either be directed to the left  
449 or right visual field; these conditions were each modeled with a regressor. We so obtained four  
450 regressors for each of the conditions of interest. Thus, for a given retinotopic region of interest,  
451 the four different conditions were: stimulus, no stimulus, attended, and unattended. We used  
452 a double-gamma function, as defined by SPM (parameters: time-to-peak first gamma: 5 second,  
453 time-to-peak second gamma: 10 seconds, amplitude ratio: 2:1), to model the fMRI responses. These  
454 parameters were established based on an initial finite impulse response (FIR) analysis (*Friston et al.,*  
455 *1998*) using the visual stimulus response from four pilot subjects (not included in the current study).  
456 Based on the observed fMRI response in this pilot data set, temporal or dispersion derivatives were  
457 not included into the statistical model of the main experiment. The baseline signal of each run  
458 was captured by adding a regressor column of ones for each run separately. As described above,  
459 the data were pre-processed by means of nuisance regression. This was performed by adding the  
460 nuisance regressors to the design matrix, effectively adjusting for the statistical loss in degrees of  
461 freedom as a result of nuisance regression. The reference of one percent signal change was the  
462 height of a peak of a two-second-long isolated event (*Mumford, 2007*).

463 We additionally performed a Finite Impulse Response (FIR) analysis to qualitatively assess the  
464 BOLD response over time for each of the four conditions. This was used to confirm that the used  
465 HRF would accurately describe the true BOLD response. To visualize the cortical response over  
466 time for each of the four conditions, we analyzed the data using FIR filters (*Friston et al., 1998*),  
467 applied to each layer. Specifically, we constructed FIR regressors for each of the four experimental  
468 conditions, each containing 18 time points that represented a time window of 1 second, starting 2  
469 seconds before stimulus onset and running until 15 seconds thereafter.

470 We started at the level of the cortical region, initially with no further specification into layers.  
471 The temporal regressions were performed on the previously extracted time course of V1, V2, and  
472 V3. The obtained parameter estimates were divided by their baseline estimates, in order to convert  
473 them to percent signal change. The values in percent signal were compared at the group level  
474 by means of ANOVAs and t-tests as appropriate. As the experiment was left-right symmetric and  
475 we found no differences between hemispheres in the analyses of interest, the hemispheres were  
476 treated as two measurements per participant.

477 We subsequently focused on the laminar level. For a qualitative assessment of the layer specific  
478 BOLD response, we repeated the FIR analysis for each experimental condition and each layer. These  
479 qualitative results are shown in *Figure 2*. The BOLD responses do not seem to vary per layer beyond  
480 a general intensity increase towards the pial surface. To further investigate this quantitatively, we  
481 repeated the region specific analysis with the addition of the 'layer' factor. By means of an ANOVA,  
482 we ascertained layer specific effects and their interactions with the stimulus and the region effects.  
483 These were followed by t-tests where appropriate, to further inspect significant results. As the  
484 experiment was left-right symmetric and we found no differences between hemispheres in the  
485 analyses of interest, we took the hemisphere data as two measurements per participant.



## 486 **Code and data availability**

487 All code and data can be found online: <https://doi.org/10.34973/bf42-rx14> for a full data set for  
488 a single subject and all raw files from the scanner <https://doi.org/10.34973/eb4d-md15>. Layer-  
489 specific analysis were performed using custom-written software available online <https://github.com/TimVanMourik/OpenFmriAnalysis>. This pipeline can be inspected graphically (*Van Mourik*  
490 *et al., 2018*) (<https://giraffe.tools/workflow/TimVanMourik/LayerAttention>). Moreover, it can readily  
491 be applied to custom data; we prepared data from a representative subject to be used as a template  
492 pipeline.

493  
494 Preprocessing of the data and construction of design matrices was performed in MATLAB. The  
495 FIR analysis, the region of interest analysis, and the layer specific analyses were performed in an  
496 openly available Jupyter notebook (available at <https://doi.org/10.5281/zenodo.3428603>).

## 497 **Author Contributions**

498 PJK and JFMJ designed the experiment. TvM and LJB collected the data. TvM and DGN developed the  
499 laminar analysis techniques. TvM and JFMJ analysed the data. TvM, DGN, and JFMJ wrote the paper.

## 500 **References**

- 501 **Alitto HJ**, Usrey WM. Corticothalamic feedback and sensory processing. *Curr Opin Neurobiol.* 2003 Aug;  
502 13(4):440–445.
- 503 **Andersson JLR**, Hutton C, Ashburner J, Turner R, Friston K. Modeling Geometric Deformations in {EPI}  
504 Time Series. *NeuroImage.* 2001; 13(5):903 – 919. <http://www.sciencedirect.com/science/article/pii/S1053811901907463>, doi: <http://dx.doi.org/10.1006/nimg.2001.0746>.
- 505  
506 **Armstrong KM**, Fitzgerald JK, Moore T. Changes in Visual Receptive Fields with Microstimulation of Frontal  
507 Cortex. *Neuron.* 2006; 50(5):791 – 798. <http://www.sciencedirect.com/science/article/pii/S0896627306003771>,  
508 doi: <http://doi.org/10.1016/j.neuron.2006.05.010>.
- 509 **Arsigny V**, Pennec X, Ayache N. Polyrigid and Polyaffine Transformations: A New Class of Diffeomorphisms for  
510 Locally Rigid or Affine Registration. In: Ellis RE, Peters TM, editors. *Proc. of MICCAI'03, Part II*, vol. 2879 of LNCS  
511 Montreal: Springer; 2003. p. 829–837. doi: 10.1007/b93811.
- 512 **Ashburner J**, Friston KJ. Nonlinear Spatial Normalization using Basis Functions. *Human Brain Mapping.* 1999;  
513 7(4):254–266.
- 514 **Baldassi S**, Verghese P. Attention to locations and features: Different top-down modulation of detector weights.  
515 *Journal of Vision.* 2005; 5(6):7–7.
- 516 **Baldwin LN**, Wachowicz K, Thomas SD, Rivest R, Fallone BG. Characterization, prediction, and correction of  
517 geometric distortion in 3 T MR images. *Med Phys.* 2007 Feb; 34(2):388–399.
- 518 **Bandettini PA**. The BOLD Plot Thickens: Sign- and Layer-Dependent Hemodynamic Changes with Activation.  
519 *Neuron.* 2012; 76(3):468 – 469. <http://www.sciencedirect.com/science/article/pii/S0896627312009464>, doi:  
520 <http://dx.doi.org/10.1016/j.neuron.2012.10.026>.
- 521 **Barazany D**, Assaf Y. Visualization of cortical lamination patterns with magnetic resonance imaging. *Cerebral*  
522 *Cortex.* 2012 Sep; 22(9):2016–2023. <http://dx.doi.org/10.1093/cercor/bhr277>.
- 523 **Barone P**, Batardiere A, Knoblauch K, Kennedy H. Laminar Distribution of Neurons in Extrastriate Areas  
524 Projecting to Visual Areas V1 and V4 Correlates with the Hierarchical Rank and Indicates the Operation of a  
525 Distance Rule. *J Neurosci.* 2000 May; 20(9):3263. <http://www.jneurosci.org/content/20/9/3263.abstract>.
- 526 **Bastos AM**, Usrey WM, Adams RA, Mangun GR, Fries P, Friston KJ. Canonical microcircuits for predictive coding.  
527 *Neuron.* 2012; 76(4):695–711.
- 528 **Bastos AM**, Vezoli J, Bosman CA, Schoffelen JM, Oostenveld R, Dowdall JR, De Weerd P, Kennedy H, Fries P.  
529 Visual areas exert feedforward and feedback influences through distinct frequency channels. *Neuron.* 2015;  
530 85(2):390–401.
- 531 **Bazin PL**, Weiss M, Dinse J, Schäfer A, Trampel R, Turner R. A computational framework for ultra-high resolution  
532 cortical segmentation at 7Tesla. *Neuroimage.* 2014; 93:201–209.



- 533 **Beckmann CF**, Jenkinson M, Smith SM. General multilevel linear modeling for group analysis in FMRI. *NeuroImage*. 2003; 20(2):1052 – 1063. <http://www.sciencedirect.com/science/article/pii/S105381190300435X>, doi:  
534 [http://dx.doi.org/10.1016/S1053-8119\(03\)00435-X](http://dx.doi.org/10.1016/S1053-8119(03)00435-X).  
535
- 536 **Beckmann CF**, Mackay CE, Filippini N, Smith SM. Group comparison of resting-state FMRI data using multi-  
537 subject ICA and dual regression. *Neuroimage*. 2009; 47(Suppl 1):S148.
- 538 **Bok ST**. Der Einfluss der in den Furchen und Windungen auftretenden Krümmungen der Grosshirnrinde  
539 auf die Rindenarchitektur. *Zeitschrift für die gesamte Neurologie und Psychiatrie*. 1929; 121(1):682–750.  
540 <http://books.google.nl/books?id=vP-hGwAACAAJ>.
- 541 **Brainard DH**. The Psychophysics Toolbox. *Spatial Vision*. 1997; 10:433–436.
- 542 **Brant-Zawadzki M**, Gillan GD, Nitz WR. MP RAGE: a three-dimensional, T1-weighted, gradient-echo sequence-  
543 initial experience in the brain. *Radiology*. 1992 Mar; 182(3):769–775. [http://www.ncbi.nlm.nih.gov/pubmed/](http://www.ncbi.nlm.nih.gov/pubmed/1535892)  
544 [1535892](http://www.ncbi.nlm.nih.gov/pubmed/1535892).
- 545 **Brefczynski JA**, DeYoe EA. A physiological correlate of the ‘spotlight’ of visual attention. *Nat Neurosci*. 1999 Apr;  
546 2(4):370–374. [DOI:[10.1038/7280](https://doi.org/10.1038/7280)] [PubMed:[10204545](https://pubmed.ncbi.nlm.nih.gov/10204545/)].
- 547 **Brodmann K**. Vergleichende Lokalisationslehre der Großhirnrinde. Leipzig: Barth; 1909.
- 548 **Carrasco M**, Ling S, Read S. Attention alters appearance. *Nature neuroscience*. 2004; 7(3).
- 549 **Constantinople CM**, Bruno RM. Deep cortical layers are activated directly by thalamus. *Science*. 2013 Jun;  
550 340(6140):1591–1594. [PubMed Central:[PMC4203320](https://pubmed.ncbi.nlm.nih.gov/PMC4203320/)] [DOI:[10.1126/science.1236425](https://doi.org/10.1126/science.1236425)] [PubMed:[23812718](https://pubmed.ncbi.nlm.nih.gov/23812718/)].
- 551 **Dale AM**, Fischl B, Sereno MI. Cortical Surface-Based Analysis: I. Segmentation and Surface Reconstruction.  
552 *NeuroImage*. 1999; 9(2):179 – 194. <http://www.sciencedirect.com/science/article/pii/S1053811998903950>, doi:  
553 <http://dx.doi.org/10.1006/nimg.1998.0395>.
- 554 **de Hollander G**, van der Zwaag W, Qian C, Zhang P, Knapen T. Ultra-high field fMRI reveals origins  
555 of feedforward and feedback activity within laminae of human ocular dominance columns. *Neu-*  
556 *rolImage*. 2020; p. 117683. <http://www.sciencedirect.com/science/article/pii/S105381192031168X>, doi:  
557 <https://doi.org/10.1016/j.neuroimage.2020.117683>.
- 558 **De Martino F**, Zimmermann J, Muckli L, Uğurbil K, Yacoub E, Goebel R. Cortical depth dependent functional  
559 responses in humans at 7T: improved specificity with 3D GRASE. *PLoS ONE*. 2013; 8(3):e60514.
- 560 **DeYoe EA**, Carman GJ, Bandettini P, Glickman S, Wieser J, Cox R, Miller D, Neitz J. Mapping striate and extrastriate  
561 visual areas in human cerebral cortex. *Proceedings of the National Academy of Sciences*. 1996; 93(6):2382–  
562 2386.
- 563 **Engel SA**, Glover GH, Wandell BA. Retinotopic organization in human visual cortex and the spatial precision of  
564 functional MRI. *Cereb Cortex*. 1997 Mar; 7(2):181–192. [PubMed:[9087826](https://pubmed.ncbi.nlm.nih.gov/9087826/)].
- 565 **Esteban O**, Zosso D, Daducci A, Bach-Cuadra M, Ledesma-Carbayo MJ, Thiran JP, Santos A. Surface-driven  
566 registration method for the structure-informed segmentation of diffusion MR images. *NeuroImage*. 2016 Oct;  
567 139:450–461. <http://www.sciencedirect.com/science/article/pii/S1053811916301185>.
- 568 **Felleman DJ**, Van Essen DC. Distributed hierarchical processing in the primate cerebral cortex. *Cerebral cortex*.  
569 1991; 1(1):1–47.
- 570 **Filippini N**, MacIntosh BJ, Hough MG, Goodwin GM, Frisoni GB, Smith SM, Matthews PM, Beckmann CF, Mackay  
571 CE. Distinct patterns of brain activity in young carriers of the APOE- $\epsilon$ 4 allele. *Proceedings of the National*  
572 *Academy of Sciences*. 2009; 106(17):7209–7214. <http://www.pnas.org/content/106/17/7209.abstract>, doi:  
573 [10.1073/pnas.0811879106](https://doi.org/10.1073/pnas.0811879106).
- 574 **Finn ES**, Huber L, Jangraw DC, Molfese PJ, Bandettini PA. Layer-dependent activity in human prefrontal cortex  
575 during working memory. *Nature neuroscience*. 2019; 22(10):1687–1695.
- 576 **Fischl B**, Dale AM. Measuring the thickness of the human cerebral cortex from magnetic resonance images.  
577 *Proceedings of the National Academy of Sciences of the United States of America*. 2000 Sep; 97(20):11050–  
578 11055. <http://dx.doi.org/10.1073/pnas.200033797>.
- 579 **Fischl B**, van der Kouwe A, Destrieux C, Halgren E, Segonne F, Salat DH, Busa E, Seidman LJ, Goldstein J, Kennedy  
580 D, Caviness V, Makris N, Rosen B, Dale AM. Automatically parcellating the human cerebral cortex. *Cereb*  
581 *Cortex*. 2004 Jan; 14(1):11–22.

- 582 **Fracasso A**, Luijten PR, Dumoulin SO, Petridou N. Laminar imaging of positive and negative {BOLD} in  
583 human visual cortex at 7 T. *NeuroImage*. 2017; p. -. <http://www.sciencedirect.com/science/article/pii/S1053811917301490>, doi: <https://doi.org/10.1016/j.neuroimage.2017.02.038>.
- 585 **Friston KJ**, Holmes AP, Worsley KJ, Poline JP, Frith CD, Frackowiak RSJ. Statistical parametric maps in functional  
586 imaging: A general linear approach. *Human Brain Mapping*. 1994; 2(4):189–210. <http://dx.doi.org/10.1002/hbm.460020402>, doi: [10.1002/hbm.460020402](https://doi.org/10.1002/hbm.460020402).
- 588 **Friston K**, Ashburner J, Frith CD, Poline JB, Heather JD, Frackowiak RS, et al. Spatial registration and normalization  
589 of images. *Human brain mapping*. 1995; 3(3):165–189.
- 590 **Friston KJ**, Fletcher P, Josephs O, Holmes A, Rugg M, Turner R. Event-related fMRI: characterizing differential  
591 responses. *Neuroimage*. 1998; 7(1):30–40.
- 592 **Gandhi SP**, Heeger DJ, Boynton GM. Spatial attention affects brain activity in human primary visual cortex. *Proc*  
593 *Natl Acad Sci USA*. 1999 Mar; 96(6):3314–3319. [PubMed Central:PMCID15939] [PubMed:10077681].
- 594 **Gartus A**, Geissler A, Foki T, Tahamtan A, Pahs G, Barth M, Pinker K, Trattnig S, Beisteiner R. Comparison of fMRI  
595 coregistration results between human experts and software solutions in patients and healthy subjects. *Euro-*  
596 *pean Radiology*. 2007; 17(6):1634–1643. <http://dx.doi.org/10.1007/s00330-006-0459-z>, doi: [10.1007/s00330-006-0459-z](https://doi.org/10.1007/s00330-006-0459-z).
- 598 **Geyer S**, Schormann T, Mohlberg H, Zilles K. Areas 3a, 3b, and 1 of Human Primary Somatosensory Cortex:  
599 2. Spatial Normalization to Standard Anatomical Space. *NeuroImage*. 2000; 11(6):684 – 696. <http://www.sciencedirect.com/science/article/pii/S1053811900905482>, doi: <http://dx.doi.org/10.1006/nimg.2000.0548>.
- 600
- 601 **Glover GH**, Li TQ, Ress D. Image-based method for retrospective correction of physiological motion effects in  
602 fMRI: RETROICOR. *Magn Reson Med*. 2000 Jul; 44(1):162–167. [PubMed:10893535].
- 603 **Goebel R**. BrainVoyager—past, present, future. *Neuroimage*. 2012; 62(2):748–756.
- 604 **Greve DN**, Fischl B. Accurate and robust brain image alignment using boundary-based registration. *Neu-*  
605 *rolImage*. 2009; 48(1):63 – 72. <http://www.sciencedirect.com/science/article/pii/S1053811909006752>, doi:  
606 <http://dx.doi.org/10.1016/j.neuroimage.2009.06.060>.
- 607 **Havlicek M**, Uludağ K. A dynamical model of the laminar BOLD response. *NeuroImage*. 2020; 204:116209.
- 608 **Hubel DH**, Wiesel TN. Receptive fields and functional architecture of monkey striate cortex. *The Journal of*  
609 *physiology*. 1968; 195(1):215–243.
- 610 **Huber L**, Finn ES, Chai Y, Goebel R, Stirnberg R, Stöcker T, Marrett S, Uludag K, Kim SG, Han S,  
611 Bandettini PA, Poser BA. Layer-dependent functional connectivity methods. *Progress in Neuro-*  
612 *biology*. 2020; p. 101835. <http://www.sciencedirect.com/science/article/pii/S0301008220300903>, doi:  
613 <https://doi.org/10.1016/j.pneurobio.2020.101835>.
- 614 **Huber L**, Goense J, Kennerley AJ, Trampel R, Guidi M, Reimer E, Ivanov D, Neef N, Gauthier CJ, Turner  
615 R, Möller HE. Cortical lamina-dependent blood volume changes in human brain at 7 T. *Neu-*  
616 *rolImage*. 2015; 107:23 – 33. <http://www.sciencedirect.com/science/article/pii/S1053811914009768>, doi:  
617 <http://dx.doi.org/10.1016/j.neuroimage.2014.11.046>.
- 618 **Huber L**, Handwerker DA, Jangraw DC, Chen G, Hall A, Stüber C, Gonzalez-Castillo J, Ivanov D, Marrett S, Guidi  
619 M, et al. High-resolution CBV-fMRI allows mapping of laminar activity and connectivity of cortical input and  
620 output in human M1. *Neuron*. 2017; 96(6):1253–1263.
- 621 **Huber L**, Tse DHY, Wiggins CJ, Uludağ K, Kashyap S, Jangraw DC, Bandettini PA, Poser BA, Ivanov D. Ultra-  
622 high resolution blood volume fMRI and BOLD fMRI in humans at 9.4T: Capabilities and challenges. *Neu-*  
623 *rolImage*. 2018; 178:769 – 779. <http://www.sciencedirect.com/science/article/pii/S1053811918305329>, doi:  
624 <https://doi.org/10.1016/j.neuroimage.2018.06.025>.
- 625 **Huntenburg JM**, Steele CJ, Bazin PL. Nighres: processing tools for high-resolution neuroimaging. *GigaScience*.  
626 2018; 7(7):giy082.
- 627 **Hutton C**, Bork A, Josephs O, Deichmann R, Ashburner J, Turner R. Image Distortion Correction in fMRI: A  
628 Quantitative Evaluation. *NeuroImage*. 2002; 16(1):217 – 240. <http://www.sciencedirect.com/science/article/pii/S1053811901910547>, doi: <http://dx.doi.org/10.1006/nimg.2001.1054>.
- 629

- 630 **Jehee JF**, Brady DK, Tong F. Attention improves encoding of task-relevant features in the human visual cortex.  
631 *J Neurosci*. 2011 Jun; 31(22):8210–8219. [PubMed Central:PM3134176] [DOI:10.1523/JNEUROSCI.6153-  
632 09.2011] [PubMed:21632942].
- 633 **Jehee JF**, Ling S, Swisher JD, van Bergen RS, Tong F. Perceptual learning selectively refines orientation represen-  
634 tations in early visual cortex. *Journal of Neuroscience*. 2012; 32(47):16747–16753.
- 635 **Jenkinson M**, Bannister P, Brady M, Smith S. Improved Optimization for the Robust and Accurate Linear  
636 Registration and Motion Correction of Brain Images. *NeuroImage*. 2002; 17(2):825 – 841. <http://www.sciencedirect.com/science/article/pii/S1053811902911328>, doi: <http://dx.doi.org/10.1006/nimg.2002.1132>.
- 637 **Jenkinson M**, Smith S. A global optimisation method for robust affine registration of brain images. *Medical  
638 Image Analysis*. 2001; 5(2):143 – 156. <http://www.sciencedirect.com/science/article/pii/S1361841501000366>,  
639 doi: [http://dx.doi.org/10.1016/S1361-8415\(01\)00036-6](http://dx.doi.org/10.1016/S1361-8415(01)00036-6).
- 640 **Jezzard P**, Balaban RS. Correction for geometric distortion in echo planar images from B0 field variations.  
641 *Magnetic Resonance in Medicine*. 1995; 34(1):65–73. <http://dx.doi.org/10.1002/mrm.1910340111>, doi:  
642 10.1002/mrm.1910340111.
- 643 **Jones EG**. Viewpoint: the core and matrix of thalamic organization. *Neuroscience*. 1998; 85(2):331 – 345.  
644 <http://www.sciencedirect.com/science/article/pii/S0306452297005812>, doi: [http://dx.doi.org/10.1016/S0306-4522\(97\)00581-2](http://dx.doi.org/10.1016/S0306-4522(97)00581-2).
- 645 **Kamitani Y**, Tong F. Decoding the visual and subjective contents of the human brain. *Nat Neurosci*. 2005 May;  
646 8(5):679–685. [PubMed Central:PM31808230] [DOI:10.1038/nn1444] [PubMed:15852014].
- 647 **Kastner S**, Pinsk MA, De Weerd P, Desimone R, Ungerleider LG. Increased activity in human visual cortex during  
648 directed attention in the absence of visual stimulation. *Neuron*. 1999 Apr; 22(4):751–761. [PubMed:10230795].
- 649 **van Kerkoerle T**, Self MW, Roelfsema PR. Layer-specificity in the effects of attention and working memory on  
650 activity in primary visual cortex. *Nat Commun*. 2017 Jan; 8:13804.
- 651 **van Kerkoerle T**, Self MW, Dagnino B, Gariel-Mathis MA, Poort J, van der Togt C, Roelfsema PR. Alpha and  
652 gamma oscillations characterize feedback and feedforward processing in monkey visual cortex. *Proceedings  
653 of the National Academy of Sciences*. 2014; 111(40):14332–14341. [http://www.pnas.org/content/111/40/  
654 14332.abstract](http://www.pnas.org/content/111/40/14332.abstract), doi: 10.1073/pnas.1402773111.
- 655 **Kim M**, Wu G, Wang Q, Lee SW, Shen D. Improved image registration by sparse patch-based deformation  
656 estimation. *NeuroImage*. 2015; 105(0):257 – 268. [http://www.sciencedirect.com/science/article/pii/  
657 S105381191400843X](http://www.sciencedirect.com/science/article/pii/S105381191400843X), doi: <http://dx.doi.org/10.1016/j.neuroimage.2014.10.019>.
- 658 **Klein A**, Andersson J, Ardekani BA, Ashburner J, Avants B, Chiang MC, Christensen GE, Collins DL, Gee J, Hel-  
659 lier P, Song JH, Jenkinson M, Lepage C, Rueckert D, Thompson P, Vercauteren T, Woods RP, Mann JJ, Parsey  
660 RV. Evaluation of 14 nonlinear deformation algorithms applied to human brain MRI registration. *Neu-  
661 roImage*. 2009; 46(3):786 – 802. <http://www.sciencedirect.com/science/article/pii/S1053811908012974>, doi:  
662 <http://dx.doi.org/10.1016/j.neuroimage.2008.12.037>.
- 663 **Klein BP**, Fracasso A, van Dijk JA, Paffen CLE, te Pas SF, Dumoulin SO. Cortical depth de-  
664 pendent population receptive field attraction by spatial attention in human V1. *NeuroImage*.  
665 2018; 176:301 – 312. <http://www.sciencedirect.com/science/article/pii/S1053811918303653>, doi:  
666 <https://doi.org/10.1016/j.neuroimage.2018.04.055>.
- 667 **Kleinnijenhuis M**, van Mourik T, Norris DG, Ruiters DJ, van Cappellen van Walsum AM, Barth M. Dif-  
668 fusion tensor characteristics of gyrencephaly using high resolution diffusion MRI in vivo at 7T. *Neu-  
669 roImage*. 2015; 109:378 – 387. <http://www.sciencedirect.com/science/article/pii/S1053811915000038>, doi:  
670 <http://dx.doi.org/10.1016/j.neuroimage.2015.01.001>.
- 671 **Kok P**, Bains LJ, van Mourik T, Norris DG, de Lange FP. Selective Activation of the Deep Layers of the Human  
672 Primary Visual Cortex by Top-Down Feedback. *Current Biology*. 2016; 26(3):371–376. [http://dx.doi.org/10.  
673 1016/j.cub.2015.12.038](http://dx.doi.org/10.1016/j.cub.2015.12.038), doi: 10.1016/j.cub.2015.12.038.
- 674 **Koopmans PJ**, Barth M, Norris DG. Layer-specific BOLD activation in human V1. *Human Brain Mapping*. 2010  
675 Sep; 31(9):1297–1304.
- 676 **Koopmans PJ**, Barth M, Orzada S, Norris DG. Multi-echo fMRI of the cortical laminae in humans at 7 T.  
677 *Neuroimage*. 2011 Jun; 56(3):1276–1285.

- 680 **Kriegeskorte N**, Cusack R, Bandettini P. How does an fMRI voxel sample the neuronal activity pattern: compact-  
681 kernel or complex spatiotemporal filter? *Neuroimage*. 2010 Feb; 49(3):1965–1976.
- 682 **Lauritzen M**. Reading vascular changes in brain imaging: is dendritic calcium the key? *Nat Rev Neurosci*. 2005  
683 Jan; 6(1):77–85. <http://dx.doi.org/10.1038/nrn1589>.
- 684 **Lawrence SJ**, Formisano E, Muckli L, de Lange FP. Laminar fMRI: Applications for cognitive neuroscience.  
685 *Neuroimage*. 2019; 197:785–791.
- 686 **Lawrence SJ**, van Mourik T, Kok P, Koopmans PJ, Norris DG, de Lange FP. Laminar organization of working  
687 memory signals in human visual cortex. *Current Biology*. 2018; 28(21):3435–3440.
- 688 **Lee DK**, Koch C, Braun J. Spatial vision thresholds in the near absence of attention. *Vision Research*.  
689 1997; 37(17):2409 – 2418. <http://www.sciencedirect.com/science/article/pii/S0042698997000552>, doi:  
690 [http://dx.doi.org/10.1016/S0042-6989\(97\)00055-2](http://dx.doi.org/10.1016/S0042-6989(97)00055-2).
- 691 **Lee TS**, Mumford D, Zhu SC, Lamme VA. The role of V1 in shape representation. In: *Computational Neuroscience*  
692 Springer; 1997.p. 697–703.
- 693 **Leprince Y**, Poupon F, Delzescaux T, Hasboun D, Poupon C, Rivière D. Combined Laplacian-equivolumic model  
694 for studying cortical lamination with ultra high field MRI (7 T). In: *Biomedical Imaging (ISBI), 2015 IEEE 12th*  
695 *International Symposium on*; 2015. p. 580–583. doi: [10.1109/ISBI.2015.7163940](https://doi.org/10.1109/ISBI.2015.7163940).
- 696 **Li X**, Lu ZL, Tjan BS, Doshier BA, Chu W. Blood oxygenation level-dependent contrast response functions identify  
697 mechanisms of covert attention in early visual areas. *Proc Natl Acad Sci USA*. 2008 Apr; 105(16):6202–6207.
- 698 **Ling S**, Liu T, Carrasco M. How spatial and feature-based attention affect the gain and tuning of population  
699 responses. *Vision research*. 2009; 49(10):1194–1204.
- 700 **Logothetis NK**, Pauls J, Augath M, Trinath T, Oeltermann A. Neurophysiological investigation of the basis of the  
701 fMRI signal. *Nature*. 2001 Jul; 412(6843):150–157. <http://dx.doi.org/10.1038/35084005>.
- 702 **Maass A**, Schütze H, Speck O, Yonelinas A, Tempelmann C, Heinze HJ, Berron D, Cardenas-Blanco A, Brodersen  
703 KH, Enno Stephan K, Düzel E. Laminar activity in the hippocampus and entorhinal cortex related to novelty  
704 and episodic encoding. *Nature Communications*. 2014 Nov; 5. <http://dx.doi.org/10.1038/ncomms6547>.
- 705 **Maes F**, Collignon A, Vandermeulen D, Marchal G, Suetens P. Multimodality image registration by maximization of  
706 mutual information. *IEEE Transactions on Medical Imaging*. 1997 April; 16(2):187–198. doi: [10.1109/42.563664](https://doi.org/10.1109/42.563664).
- 707 **Maes F**, Vandermeulen D, Suetens P. Comparative evaluation of multiresolution optimization strategies  
708 for multimodality image registration by maximization of mutual information. *Medical Image Anal-*  
709 *ysis*. 1999; 3(4):373 – 386. <http://www.sciencedirect.com/science/article/pii/S1361841599800309>, doi:  
710 [http://dx.doi.org/10.1016/S1361-8415\(99\)80030-9](http://dx.doi.org/10.1016/S1361-8415(99)80030-9).
- 711 **Maier A**, Adams GK, Aura C, Leopold DA. Distinct superficial and deep laminar domains of activity in the visual  
712 cortex during rest and stimulation. *Front Syst Neurosci*. 2010; 4.
- 713 **Mansfield P**. Multi-planar image formation using NMR spin echoes. *Journal of Physics C: Solid State Physics*.  
714 1977; 10(3):L55. <http://stacks.iop.org/0022-3719/10/i=3/a=004>.
- 715 **Markuerkiaga I**, Barth M, Norris DG. A cortical vascular model for examining the specificity of the lami-  
716 nar {BOLD} signal. *NeuroImage*. 2016; 132:491 – 498. [http://www.sciencedirect.com/science/article/pii/](http://www.sciencedirect.com/science/article/pii/S1053811916001919)  
717 [S1053811916001919](http://dx.doi.org/10.1016/j.neuroimage.2016.02.073), doi: <http://dx.doi.org/10.1016/j.neuroimage.2016.02.073>.
- 718 **Marques JP**, Kober T, Krueger G, van der Zwaag W, Van de Moortele PF, Gruetter R. MP2RAGE, a self bias-  
719 field corrected sequence for improved segmentation and T1-mapping at high field. *Neuroimage*. 2010 Jan;  
720 49(2):1271–1281. <http://dx.doi.org/10.1016/j.neuroimage.2009.10.002>.
- 721 **Martinez-Trujillo JC**, Treue S. Feature-Based Attention Increases the Selectivity of Population Responses in  
722 Primate Visual Cortex. *Current Biology*. 2004; 14(9):744 – 751. [http://www.sciencedirect.com/science/article/](http://www.sciencedirect.com/science/article/pii/S0960982204002684)  
723 [pii/S0960982204002684](http://dx.doi.org/10.1016/j.cub.2004.04.028), doi: <http://dx.doi.org/10.1016/j.cub.2004.04.028>.
- 724 **Martinez-Trujillo JC**, Treue S. Feature-Based Attention Increases the Selectivity of Population Responses in  
725 Primate Visual Cortex. *Current Biology*. 2004; 14(9):744 – 751. [http://www.sciencedirect.com/science/article/](http://www.sciencedirect.com/science/article/pii/S0960982204002684)  
726 [pii/S0960982204002684](http://dx.doi.org/10.1016/j.cub.2004.04.028), doi: <http://dx.doi.org/10.1016/j.cub.2004.04.028>.
- 727 **MATLAB**. version 7.10.0 (R2014b). Natick, Massachusetts: The MathWorks Inc.; 2014.

- 728 **Muckli L**, De Martino F, Vizioli L, Petro LS, Smith FW, Ugurbil K, Goebel R, Yacoub E. Contextual Feedback to  
729 Superficial Layers of V1. *Current Biology*. 2015; 25(20):2690–2695. <http://dx.doi.org/10.1016/j.cub.2015.08.057>,  
730 doi: 10.1016/j.cub.2015.08.057.
- 731 **Mugler JP**, Brookeman JR. Three-dimensional magnetization-prepared rapid gradient-echo imaging (3D MP  
732 RAGE). *Magnetic Resonance in Medicine*. 1990; 15(1):152–157. <http://dx.doi.org/10.1002/mrm.1910150117>,  
733 doi: 10.1002/mrm.1910150117.
- 734 **Mumford JA**, UCLA, editor, Percent Change and Power Calculation. UCLA Advanced NeuroImaging; 2007.
- 735 **Mumford JA**, Poline JB, Poldrack RA. Orthogonalization of Regressors in fMRI Models. *PLoS ONE*. 2015 04;  
736 10(4):e0126255. doi: 10.1371/journal.pone.0126255.
- 737 **Murray SO**. The effects of spatial attention in early human visual cortex are stimulus independent. *J Vis*. 2008  
738 Aug; 8(10):1–11. [DOI:10.1167/8.10.2] [PubMed:19146344].
- 739 **Nandy AS**, Nassi JJ, Reynolds JH. Laminar Organization of Attentional Modulation in Macaque Visual Area {V4}.  
740 *Neuron*. 2017; 93(1):235 – 246. <http://www.sciencedirect.com/science/article/pii/S0896627316308674>, doi:  
741 <http://doi.org/10.1016/j.neuron.2016.11.029>.
- 742 **Navarro KT**, Sanchez MJ, Engel SA, Olman CA, Weldon KB. Depth-dependent functional MRI responses to chro-  
743 matic and achromatic stimuli throughout V1 and V2. *NeuroImage*. 2021; 226:117520. <http://www.sciencedirect.com/science/article/pii/S1053811920310053>, doi: <https://doi.org/10.1016/j.neuroimage.2020.117520>.
- 744
- 745 **Nieuwenhuis S**, Forstmann BU, Wagenmakers EJ. Erroneous analyses of interactions in neuroscience: a problem  
746 of significance. *Nat Neurosci*. 2011 Aug; 14(9):1105–1107. [DOI:10.1038/nn.2886] [PubMed:21878926].
- 747 **Norris DG**. Principles of magnetic resonance assessment of brain function. *Journal of Magnetic Resonance*  
748 *Imaging*. 2006; 23(6):794–807. <http://dx.doi.org/10.1002/jmri.20587>, doi: 10.1002/jmri.20587.
- 749 **O'Herron P**, Chhatbar PY, Levy M, Shen Z, Schramm AE, Lu Z, Kara P. Neural correlates of single-vessel  
750 haemodynamic responses in vivo. *Nature*. 2016 May; advance online publication:–. <http://dx.doi.org/10.1038/nature17965>.
- 751
- 752 **Olman CA**, Harel N, Feinberg DA, He S, Zhang P, Ugurbil K, Yacoub E. Layer-specific fMRI reflects different  
753 neuronal computations at different depths in human V1. *PLoS ONE*. 2012; 7(3):e32536.
- 754 **Pelli DG**. The VideoToolbox software for visual psychophysics: Transforming numbers into movies. *Spatial*  
755 *Vision*. 1997; 10:437–442.
- 756 **Polimeni JR**, Fischl B, Greve DN, Wald LL. Laminar analysis of 7T BOLD using an imposed spatial activation  
757 pattern in human V1. *Neuroimage*. 2010 Oct; 52(4):1334–1346.
- 758 **Poser BA**, Koopmans PJ, Witzel T, Wald LL, Barth M. Three dimensional echo-planar imaging at 7 Tesla.  
759 *Neuroimage*. 2010 May; 51(1):261–266. <http://dx.doi.org/10.1016/j.neuroimage.2010.01.108>.
- 760 **Posner MI**. Orienting of attention. *Quarterly Journal of Experimental Psychology*. 1980; 32(1):3–25. doi:  
761 10.1080/00335558008248231, PMID: 7367577.
- 762 **Ress D**, Glover GH, Liu J, Wandell B. Laminar profiles of functional activity in the human brain. *Neu-*  
763 *roImage*. 2007; 34(1):74 – 84. <http://www.sciencedirect.com/science/article/pii/S1053811906008809>, doi:  
764 <http://dx.doi.org/10.1016/j.neuroimage.2006.08.020>.
- 765 **Roche A**, Malandain G, Pennec X, Ayache N. The correlation ratio as a new similarity measure for multimodal  
766 image registration. In: Wells WM, Colchester A, Delp S, editors. *Medical Image Computing and Computer-Assisted*  
767 *Intervention, MICCAI 1998*, vol. 1496 of Lecture Notes in Computer Science Springer Berlin Heidelberg; 1998.p.  
768 1115–1124. <http://dx.doi.org/10.1007/BFb0056301>, doi: 10.1007/BFb0056301.
- 769 **Saad ZS**, Glen DR, Chen G, Beauchamp MS, Desai R, Cox RW. A new method for improving functional-to-structural  
770 {MRI} alignment using local Pearson correlation. *NeuroImage*. 2009; 44(3):839 – 848. <http://www.sciencedirect.com/science/article/pii/S1053811908010409>, doi: <http://dx.doi.org/10.1016/j.neuroimage.2008.09.037>.
- 771
- 772 **Saenz M**, Buracas GT, Boynton GM. Global effects of feature-based attention in human visual cortex. *Nat*  
773 *Neurosci*. 2002 Jul; 5(7):631–632. [DOI:10.1038/nn876] [PubMed:12068304].
- 774 **Scheeringa**, Koopmans, van Mourik, Norris, Jensen. The relationship between oscillatory EEG activity and the  
775 laminar-specific BOLD signal. *PNAS*. 2016; .



- 776 **Scheeringa R**, Koopmans PJ, Van Mourik T, Jensen O, Norris DG. The relationship between oscillatory EEG  
777 activity and the laminar-specific BOLD signal. *Proceedings of the National Academy of Sciences*. 2016; p.  
778 201522577.
- 779 **Schmitt F**, Stehling MK, Turner R. *Echo-Planar Imaging, Theory, Technique and Application*. Springer; 1998.
- 780 **Self MW**, van Kerkoerle T, Supèr H, Roelfsema PR. Distinct Roles of the Cortical Layers of Area V1 in Figure-  
781 Ground Segregation. *Current Biology*. 2013; 23(21):2121 – 2129. [http://www.sciencedirect.com/science/](http://www.sciencedirect.com/science/article/pii/S0960982213011299)  
782 [article/pii/S0960982213011299](http://www.sciencedirect.com/science/article/pii/S0960982213011299), doi: <http://doi.org/10.1016/j.cub.2013.09.013>.
- 783 **Sereno MI**, Dale A, Reppas J, Kwong K, et al. Borders of multiple visual areas in humans revealed by functional  
784 magnetic resonance imaging. *Science*. 1995; 268(5212):889.
- 785 **Sethian JA**. *Level Set Methods and Fast Marching Methods*. Cambridge University Press; 1999.
- 786 **Sharoh D**, Van Mourik T, Bains LJ, Segaert K, Weber K, Hagoort P, Norris DG. Laminar specific fMRI reveals  
787 directed interactions in distributed networks during language processing. *Proceedings of the National*  
788 *Academy of Sciences*. 2019; 116(42):21185–21190.
- 789 **Shipp S**. Neural Elements for Predictive Coding. *Frontiers in Psychology*. 2016 Oct; 7:1792. [http://www.ncbi.nlm.](http://www.ncbi.nlm.nih.gov/pmc/articles/PMC5114244/)  
790 [nih.gov/pmc/articles/PMC5114244/](http://www.ncbi.nlm.nih.gov/pmc/articles/PMC5114244/).
- 791 **Shipp S**, Adams RA, Friston KJ. Reflections on agranular architecture: predictive coding in the motor cor-  
792 tex. *Trends in Neurosciences*. 2013 Dec; 36(12):706–716. [http://www.sciencedirect.com/science/article/pii/](http://www.sciencedirect.com/science/article/pii/S0166223613001604)  
793 [S0166223613001604](http://www.sciencedirect.com/science/article/pii/S0166223613001604).
- 794 **Siero JC**, Petridou N, Hoogduin H, Luijten PR, Ramsey NF. Cortical depth-dependent temporal dynamics of the  
795 BOLD response in the human brain. *Journal of Cerebral Blood Flow and Metabolism*. 2011 Oct; 31(10):1999–  
796 2008.
- 797 **Siero JCW**, Ramsey NF, Hoogduin H, Klomp DWJ, Luijten PR, Petridou N. BOLD Specificity and Dynamics Evaluated  
798 in Humans at 7T: Comparing Gradient-Echo and Spin-Echo Hemodynamic Responses. *PLoS ONE*. 2013 01;  
799 8(1):e54560. [10.1371/journal.pone.0054560](https://doi.org/10.1371/journal.pone.0054560), doi: [10.1371/journal.pone.0054560](https://doi.org/10.1371/journal.pone.0054560).
- 800 **Smith SM**, Jenkinson M, Woolrich MW, Beckmann CF, Behrens TE, Johansen-Berg H, Bannister PR, De Luca  
801 M, Drobnjak I, Flitney DE, Niazy RK, Saunders J, Vickers J, Zhang Y, De Stefano N, Brady JM, Matthews PM.  
802 Advances in functional and structural MR image analysis and implementation as FSL. *Neuroimage*. 2004; 23  
803 Suppl 1:S208–219.
- 804 **Somers DC**, Dale AM, Seiffert AE, Tootell RB. Functional MRI reveals spatially specific attentional modulation in  
805 human primary visual cortex. *Proc Natl Acad Sci USA*. 1999 Feb; 96(4):1663–1668.
- 806 **Sprague TC**, Ester EF, Serences JT. Restoring latent visual working memory representations in human cortex.  
807 *Neuron*. 2016; 91(3):694–707.
- 808 **Sprague TC**, Serences JT. Attention modulates spatial priority maps in the human occipital, parietal and frontal  
809 cortices. *Nature neuroscience*. 2013; 16(12):1879.
- 810 **Studholme C**, Cardenas V, Song E, Ezekiel F, Maudsley A, Weiner M. Accurate template-based correction of  
811 brain MRI intensity distortion with application to dementia and aging. *Medical Imaging, IEEE Transactions on*.  
812 2004 Jan; 23(1):99–110. doi: [10.1109/TMI.2003.820029](https://doi.org/10.1109/TMI.2003.820029).
- 813 **Studholme C**, Constable RT, Duncan JS. Accurate alignment of functional EPI data to anatomical MRI using a  
814 physics-based distortion model. *Medical Imaging, IEEE Transactions on*. 2000 Nov; 19(11):1115–1127. doi:  
815 [10.1109/42.896788](https://doi.org/10.1109/42.896788).
- 816 **Studholme C**, Hill DLG, Hawkes DJ. An overlap invariant entropy measure of 3D medical image alignment. *Pat-*  
817 *tern Recognition*. 1999; 32(1):71 – 86. <http://www.sciencedirect.com/science/article/pii/S0031320398000910>.
- 818 **Tallinen T**, Chung JY, Biggins JS, Mahadevan L. Gyrfication from constrained cortical expansion. *Proceedings of*  
819 *the National Academy of Sciences of the United States of America*. 2014 Sep; 111(35):12667–12672.
- 820 **Tardif CL**, Schäfer A, Waehnert M, Dinse J, Turner R, Bazin PL. Multi-contrast multi-scale surface registration  
821 for improved alignment of cortical areas. *NeuroImage*. 2015; 111:107 – 122. [http://www.sciencedirect.com/](http://www.sciencedirect.com/science/article/pii/S105381191500097X)  
822 [science/article/pii/S105381191500097X](http://www.sciencedirect.com/science/article/pii/S105381191500097X), doi: <http://dx.doi.org/10.1016/j.neuroimage.2015.02.005>.



- 823 **Teeuwisse WM**, Brink WM, Webb AG. Quantitative assessment of the effects of high-permittivity pads in 7 Tesla  
824 MRI of the brain. *Magn Reson Med*. 2012 May; 67(5):1285–1293.
- 825 **Treue S**, Trujillo JCM. Feature-based attention influences motion processing gain in macaque visual cortex.  
826 *Nature*. 1999 Jun; 399(6736):575–579. <http://dx.doi.org/10.1038/21176>.
- 827 **Uğurbil K**. The road to functional imaging and ultrahigh fields. *NeuroImage*. 2012;  
828 62(2):726 – 735. <http://www.sciencedirect.com/science/article/pii/S1053811912001619>, doi:  
829 <http://dx.doi.org/10.1016/j.neuroimage.2012.01.134>, 20 years of fMRI.
- 830 **Van Mourik T**, Van der Eerden JP, Bazin PL, Norris DG. Laminar signal extraction over extended cortical areas by  
831 means of a spatial GLM. *PLoS one*. 2019; 14(3):e0212493.
- 832 **Van Mourik T**, Snoek L, Knapen T, Norris DG. Porcupine: A visual pipeline tool for neuroimaging analysis. *PLoS*  
833 *Computational Biology*. 2018; 14(5):e1006064.
- 834 **Vélez-Fort M**, Rousseau CV, Niedworok CJ, Wickersham IR, Rancz EA, Brown APY, Strom M, Margrie TW. The  
835 Stimulus Selectivity and Connectivity of Layer Six Principal Cells Reveals Cortical Microcircuits Underly-  
836 ing Visual Processing. *Neuron*. 2014; 83(6):1431 – 1443. [http://www.sciencedirect.com/science/article/pii/](http://www.sciencedirect.com/science/article/pii/S089662731400676X)  
837 [S089662731400676X](http://www.sciencedirect.com/science/article/pii/S089662731400676X), doi: <http://doi.org/10.1016/j.neuron.2014.08.001>.
- 838 **Waehnert MD**, Dinse J, Weiss M, Streicher MN, Waehnert P, Geyer S, Turner R, Bazin PL. Anatomically motivated  
839 modeling of cortical laminae. *Neuroimage*. 2014 Jun; 93 Pt 2:210–220.
- 840 **Waehnert MD**, Dinse J, Schäfer A, Geyer S, Bazin PL, Turner R, Tardif CL. A subject-specific framework for in vivo  
841 myeloarchitectonic analysis using high resolution quantitative MRI. *NeuroImage*. 2016; 125:94 – 107.
- 842 **Watson AB**, Pelli DG. Quest: A Bayesian adaptive psychometric method. *Perception & Psychophysics*. 1983;  
843 33:113?–120.
- 844 **Worsley KJ**, Friston KJ. Analysis of fMRI Time-Series Revisited - Again. *NeuroImage*. 1995; 2:173–181.
- 845 **Xing D**, Yeh CI, Burns S, Shapley RM. Laminar analysis of visually evoked activity in the primary visual cortex.  
846 *Proc Natl Acad Sci USA*. 2012 Aug; 109(34):13871–13876.
- 847 **Yeshurun Y**, Carrasco M. Attention improves or impairs visual performance by enhancing spatial resolution.  
848 *Nature*. 1998; 396(6706).
- 849 **Yu X**, Qian C, Chen Dy, Dodd SJ, Koretsky AP. Deciphering laminar-specific neural inputs with line-scanning fMRI.  
850 *Nature methods*. 2014; 11(1):55–58.
- 851 **Zilles K**. The human nervous system. Academic Press, San Diego, CA; 1990.

## 852 Appendix 1

### 853 Layer specific HRF for all conditions and layers

854 To assess the degree to which the results are robust to different analysis choices, we  
855 additionally analysed the data using a variety of alternative methodological parameters. This  
856 section discusses the obtained results. Our main analysis was done on a region of interest  
857 of 600 vertices. The method of extracting cortical signal was the spatial GLM (*Van Mourik  
858 et al., 2019*) with three cortical layers. We redid the main analysis with a smaller region of  
859 interest (300 vertices) and a larger one (900 vertices), other factors remaining equal. We  
860 further wanted to make sure that changing the number of layers did not qualitatively change  
861 our interpretation and recomputed the main analysis with four instead of three cortical  
862 layers. For comparison with traditional studies that use signal interpolation for obtaining  
863 laminar signal, we also employed this technique in an additional control analysis. All results  
864 (p-values) of the main analysis, the ANOVA of the factors stimulus, attention, layer, and  
865 region, are included in one table ( 1).

866 For further inspection, the results are also included as figures, analogous to *Figure 3* in  
867 the main text. *Figure Supplement 1* and *Figure Supplement 2* show stimulus and attention-  
868 based effects across layers after selecting, respectively, the 300 and 900 most activated  
869 vertices (cf. *Figure 3* in the main text, based on 600 vertices). Note that, per this selection,  
870 these results should (and do) show higher and lower activation values for the top 300 and  
871 900 vertices, respectively. *Figure Supplement 3* shows results after defining four cortical  
872 layers, rather than three, and *Figure Supplement 4* depicts results obtained from  
873 interpolation instead of a laminar spatial GLM. Error bars indicate  $\pm 1$  SEM. In all Figures,  
874 presenting a stimulus (circles) resulted in a reliable increase in BOLD response from deep  
875 to superficial layers. The BOLD response was significantly enhanced for the attended (red)  
876 compared to unattended location (blue) across layers, both when a stimulus was presented,  
877 and in the absence of visual stimulation (see Table 1 for statistics).

878 We repeated the main analysis four additional times. Thus, it is to be expected that some  
879 p-values that are around the significance threshold in the main analysis, fall slightly below or  
880 rise slightly above it in some of the control analyses. There were only two instances where  
881 significance ( $p < 0.05$ ) changed compared to the layer analyses that are presented in the  
882 main text.

883 While we observed a trending effect for the stimulus by attention interaction in the main  
884 laminar analysis (trending, with  $p = 0.0733$ ), it was significant for the analysis with a larger ROI  
885 ( $p = 0.0272$ ) and with four extracted layers ( $p = 0.0118$ ), but not for the smaller ROI ( $p = 0.271$ )  
886 and trending for the signal extraction by means of interpolation ( $p = 0.0552$ ). These results  
887 are all close together and hovering around the significance threshold of  $p = 0.05$ . A stimulus  
888 by attention effect ought to be interpreted as a multiplicative effect of stimulus and attention,  
889 i.e. an additional signal increase when the presented stimulus is attended compared to  
890 when the location per se (i.e. no stimulus) is attended. However, this trending effect does not  
891 affect any of our conclusions regarding the layer-specific effects of stimulus and attention.

892 While the Stimulus by Layer by Area interaction was significant in the main analysis ( $p =$   
893  $0.0214$ ), this interaction was not significant after selecting the 300 most activated vertices ( $p$   
894  $= 0.2056$ ). However, in the three other control analyses, the effect became more pronounced  
895 (larger ROI:  $p = 8.89 \cdot 10^{-3}$ , interpolation:  $p = 2.78 \cdot 10^{-5}$ , and four layers:  $p = 6.19 \cdot 10^{-4}$ ).

**Appendix 1 Table 1.** The p-values for the ANOVA as described in the body of the paper. The five columns are the main analysis (first column, bold face), and four control analyses: an analysis based on a smaller ROI (300 vertices); on a larger ROI (900 vertices); the same ROI but laminar signal extracted by means of interpolation instead of a GLM; and a GLM but with four layers instead of three. P-values above 0.05 are marked in black. P-values between 0.05 and 0.01 are marked in red. P-values below 0.01 are marked in green.

|                               | <b>GLM, 600 vertices</b> | GLM, 300 vertices | GLM, 900 vertices   | Interpolation | GLM, 4 Layers       |
|-------------------------------|--------------------------|-------------------|---------------------|---------------|---------------------|
| Stimulus                      | <b>1.648436e-12</b>      | 5.954187e-13      | 1.290311e-11        | 3.726032e-12  | 2.496749e-13        |
| Attention                     | <b>1.032463e-08</b>      | 3.833341e-08      | 4.175371e-09        | 9.482100e-09  | 9.216548e-09        |
| Layer                         | <b>1.067460e-13</b>      | 2.851381e-11      | 7.013292e-13        | 1.890989e-15  | 3.237563e-15        |
| Area                          | <b>1.134083e-08</b>      | 2.712885e-08      | 1.114299e-07        | 1.019932e-08  | 4.101310e-09        |
| Hemisphere                    | <b>9.914955e-01</b>      | 9.461482e-01      | 9.101537e-01        | 9.177039e-01  | 9.029095e-01        |
| Stimulus:Attention            | <b>7.331790e-02</b>      | 2.710442e-01      | <b>2.720432e-02</b> | 5.523979e-02  | <b>1.179676e-02</b> |
| Stimulus:Layer                | <b>1.433143e-13</b>      | 6.233730e-12      | 7.235421e-14        | 8.002511e-15  | 2.812629e-18        |
| Attention:Layer               | <b>8.335165e-10</b>      | 3.172532e-08      | 1.934224e-10        | 7.100456e-12  | 2.061512e-11        |
| Stimulus:Area                 | <b>9.424679e-10</b>      | 2.786488e-08      | 7.976153e-09        | 7.472970e-10  | 1.449285e-10        |
| Attention:Area                | <b>7.253885e-02</b>      | 1.208362e-01      | 7.744268e-02        | 1.406810e-01  | 8.801709e-02        |
| Layer:Area                    | <b>8.137692e-04</b>      | 3.749919e-03      | 7.251511e-03        | 1.577094e-05  | 9.033174e-02        |
| Stimulus:Attention:Layer      | <b>3.936910e-01</b>      | 7.659098e-01      | 1.507279e-01        | 7.908435e-02  | 5.661013e-01        |
| Stimulus:Attention:Area       | <b>7.370581e-01</b>      | 6.246065e-01      | 7.617405e-01        | 7.980477e-01  | 7.956297e-01        |
| Stimulus:Layer:Area           | <b>2.136465e-02</b>      | 2.055745e-01      | 8.894002e-03        | 2.779890e-05  | 6.190268e-04        |
| Attention:Layer:Area          | <b>4.155126e-01</b>      | 2.893327e-01      | 3.384936e-01        | 2.462276e-01  | 3.289884e-01        |
| Stimulus:Attention:Layer:Area | <b>8.124587e-01</b>      | 8.742156e-01      | 7.084470e-01        | 9.209281e-01  | 1.570871e-01        |

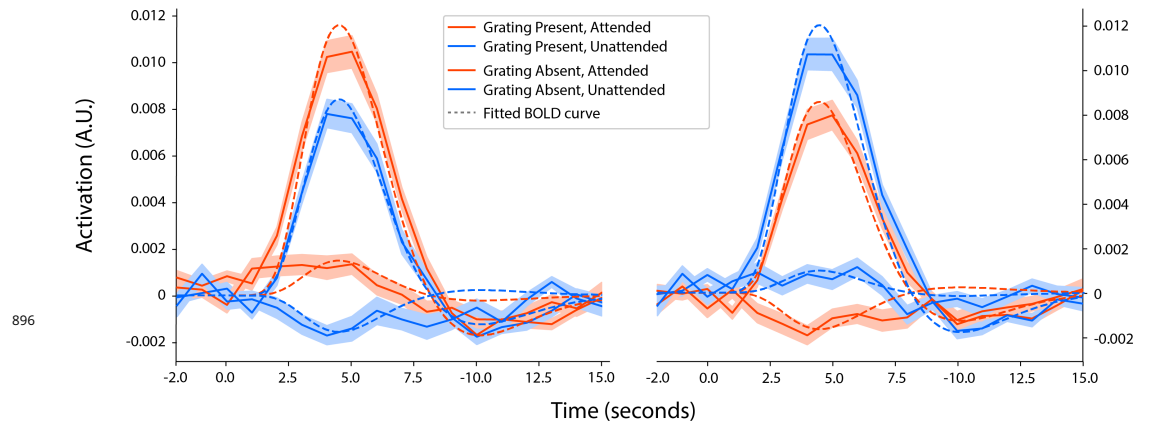

**Figure 1-Figure supplement 1.** The fitted BOLD response for each experimental condition, separated by hemisphere. The shaded area represents the standard error of the mean over subjects. Results were obtained by fitting a Finite Impulse Response function of 18 time points, starting at 2 seconds before and running until 15 seconds after stimulus onset. The dashed line indicates an HRF that was fitted to the responses in a pilot session (see Methods). The same HRF parameter values were used in other statistical analysis.

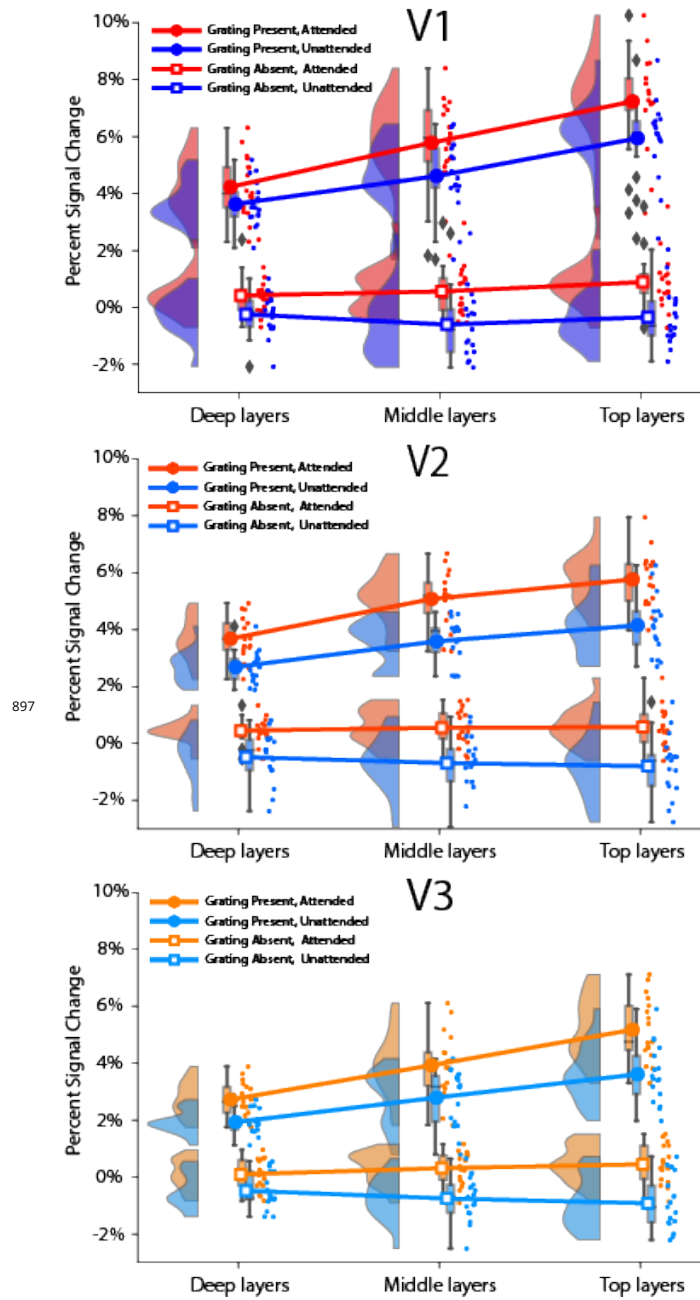

**Figure 3-Figure supplement 1.** A control analysis that is identical to the main analysis, but repeated with a smaller region of interest. Only the 300 highest activated vertices were included in the analysis.

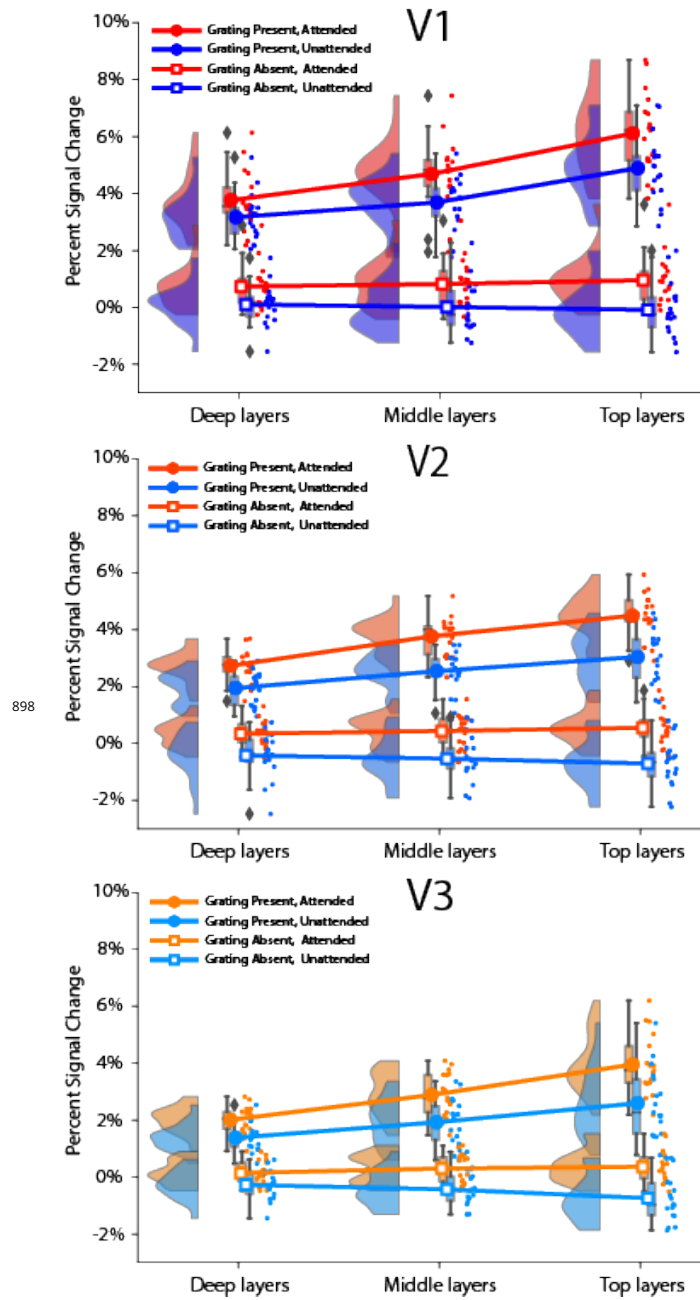

**Figure 3-Figure supplement 2.** A control analysis that is identical to the main analysis, but repeated with a larger region of interest. Only the 900 highest activated vertices were included in the analysis.



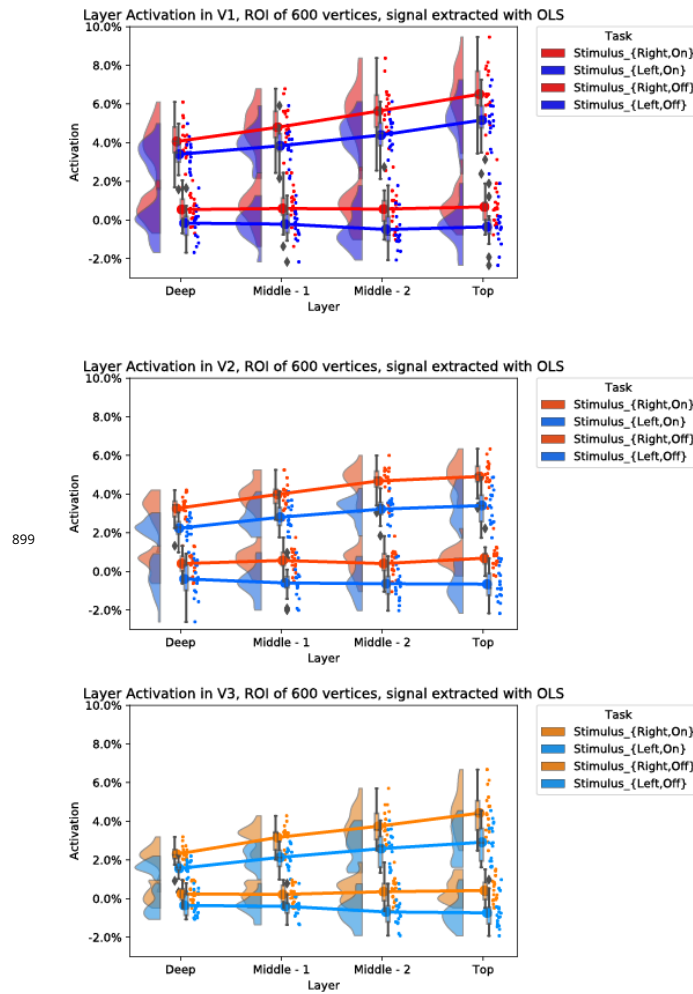

**Figure 3-Figure supplement 3.** A control analysis that is identical to the main analysis, but repeated with four extracted layers instead of three.

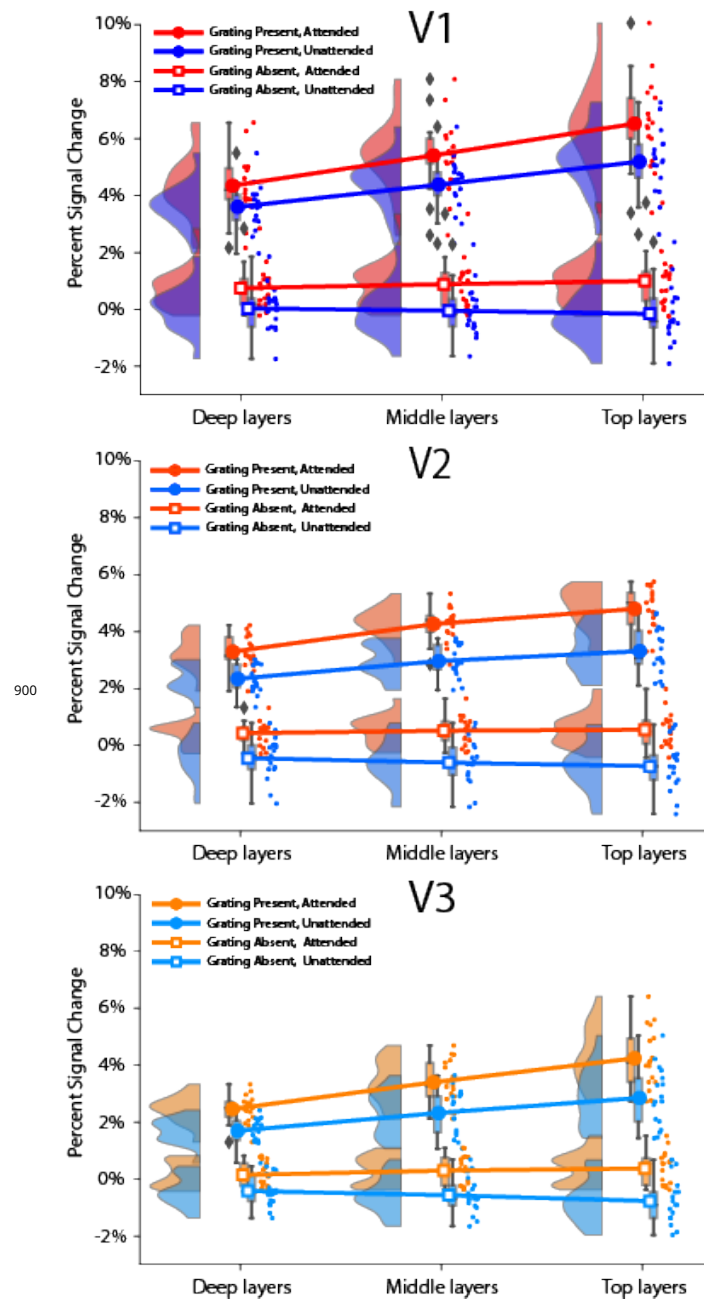

**Figure 3-Figure supplement 4.** A control analysis that is identical to the main analysis, but repeated with a different way of obtaining laminar signal.

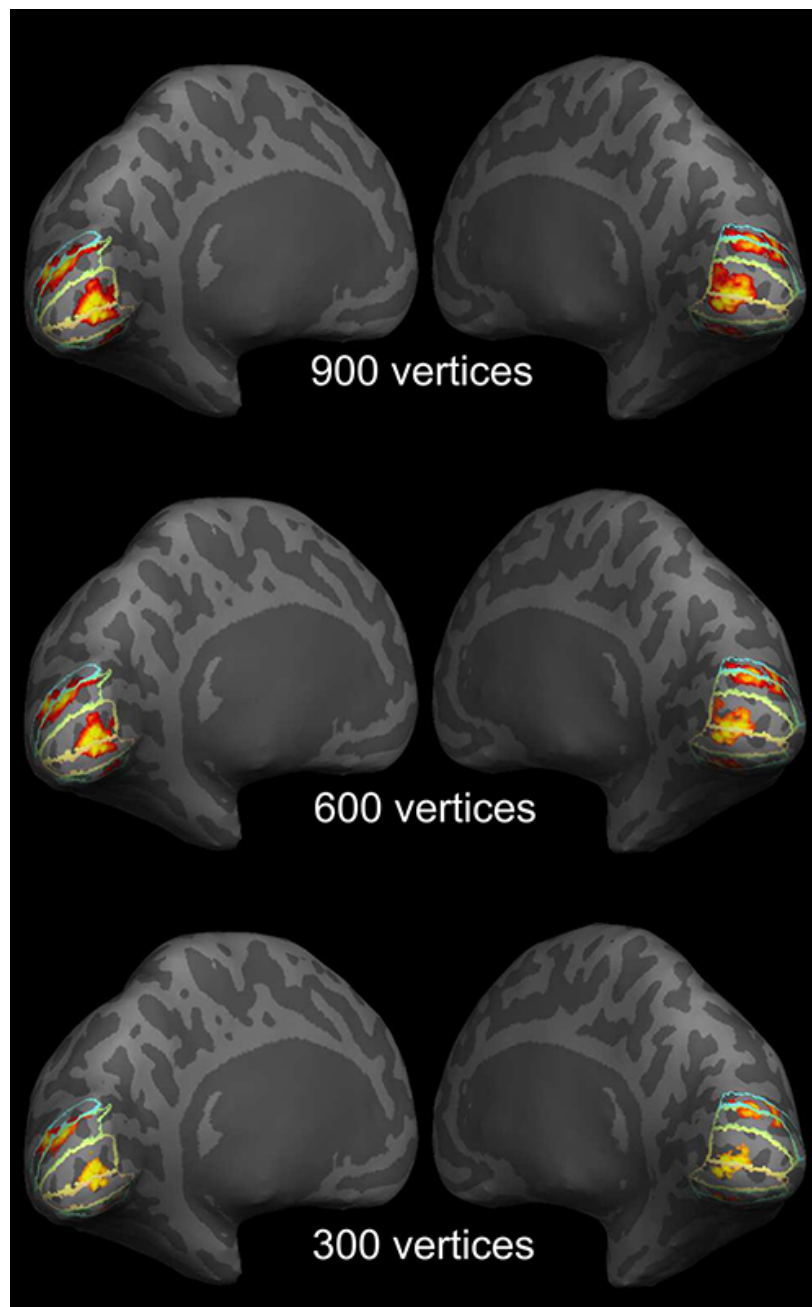

**Figure 4-Figure supplement 1.** Example of Regions of Interest on the inflated cortical surface for a representative subject. The label contours from top to bottom show dorsal V3, V2, and V1 and ventral V1, V2, and V3, in both hemispheres. The 600 most activated vertices (coloured area) per region were selected for the main analysis. The 300 and 900 vertices were used for control analyses in order to show that the effects are independent of size of region of interest.
